# Supplementary material for: Effect of spruce-derived phenolics extracted using microwave enhanced pyrolysis on the oxidative stability of biodiesel
Source: Royal Society of Chemistry journal article supplement (doi:10.1039/c5gc02520f), 2016-01-01
Supplement: c5gc02520f1.pdf [file c5gc02520f1.pdf]

## Supplementary Information

### Effect of Spruce-derived Phenolics Extracted Using Microwave Enhanced Pyrolysis on Oxidative Stability of Biodiesel

Abdulrahman S. Alwehaibi, Duncan J. Macquarrie, and Moray S. Stark

Green Chemistry Centre of Excellence, Department of Chemistry, University of York, York, YO10 5DD, UK

Identified crude bio-oil phenolics MS and their best MS match from NIST Spectral library.

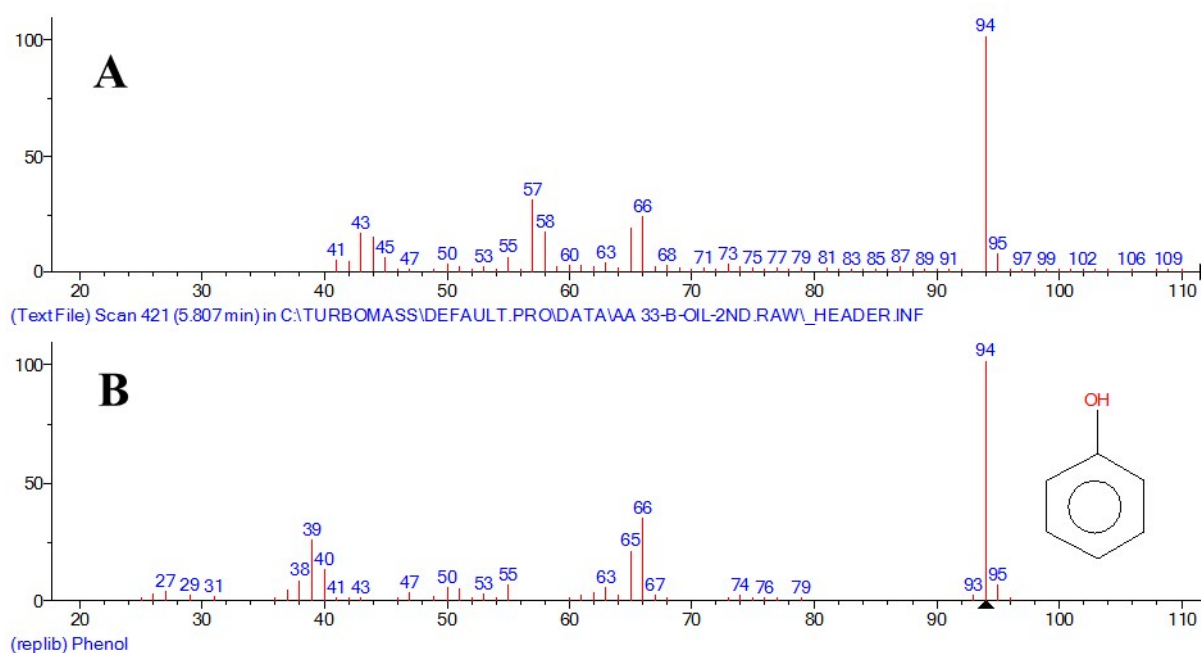

**SI Figure 1:** Matching MS spectrum of peak 5.81 MS in crude bio-oil GC-MS: A) MS of Peak 5.81 in crude bio-oil sample; B) MS of phenol according to NIST library.

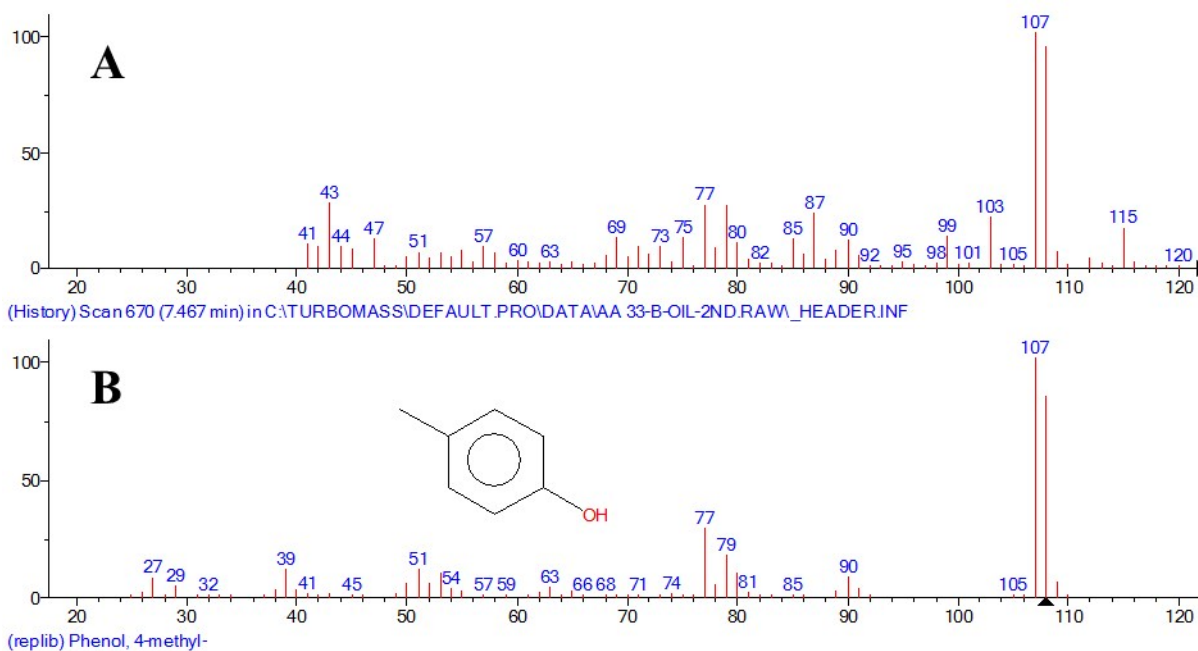

**SI Figure 2:** Matching MS spectrum of peak 7.47 MS in crude bio-oil GC-MS: A) MS of peak 7.47 MS in crude bio-oil sample; B) MS of Phenol, 4-methyl- according to NIST library.

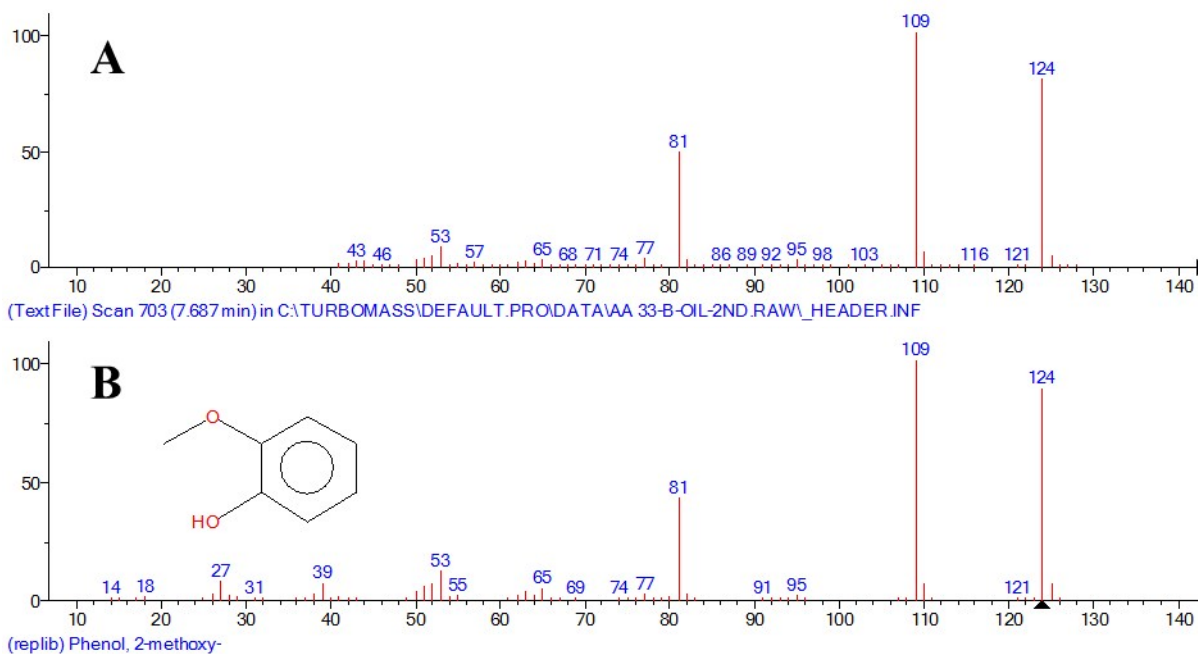

**SI Figure 3:** Matching MS spectrum of peak 7.69 MS in crude bio-oil GC-MS: A) MS of Peak 7.69 in crude bio-oil sample; B) MS of Phenol, 2-methoxy- according to NIST library.

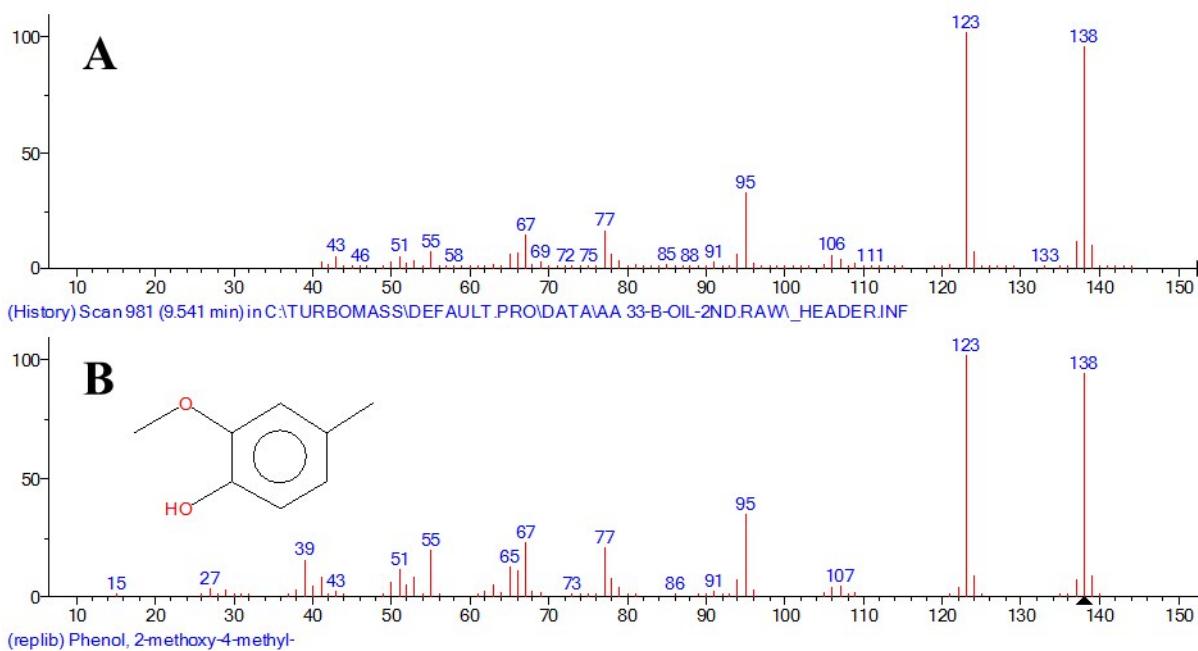

**SI Figure 4:** Matching MS spectrum of peak 9.53 MS in crude bio-oil GC-MS: A) MS of peak 9.53 MS in crude bio-oil sample; B) MS of Phenol, 2-methoxy-4-methyl- according to NIST library.

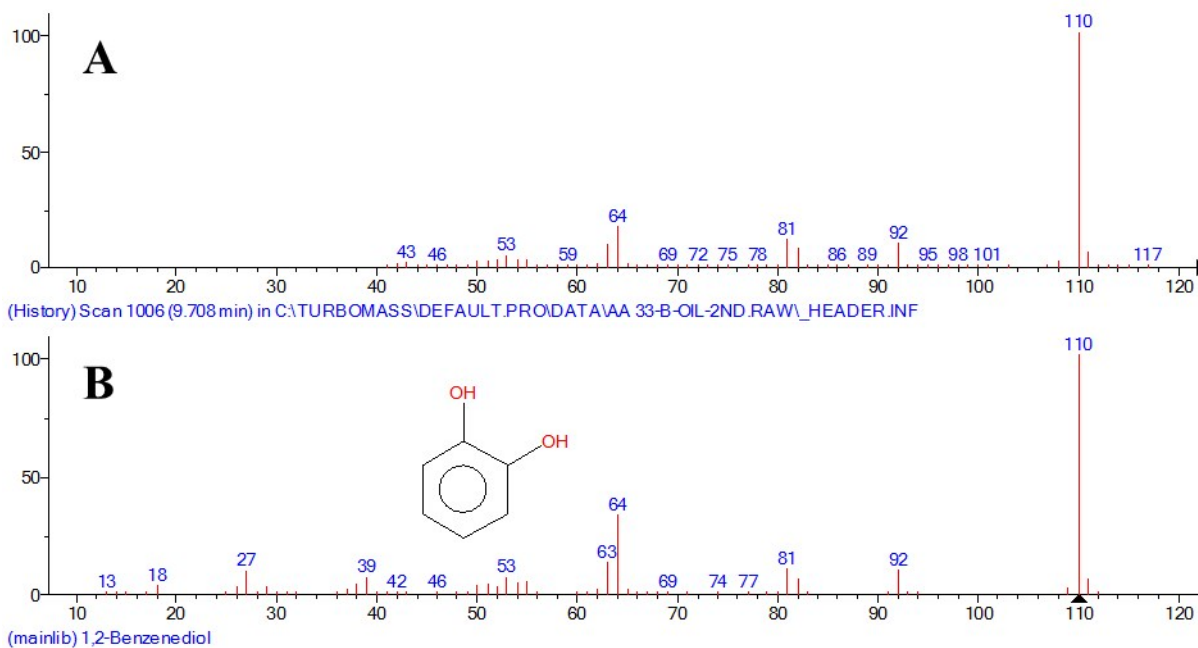

**SI Figure 5:** Matching MS spectrum of peak 9.72 MS in crude bio-oil GC-MS: A) MS of peak 9.72 in crude bio-oil sample; B) MS of 1,2-Benzenediol according to NIST library.

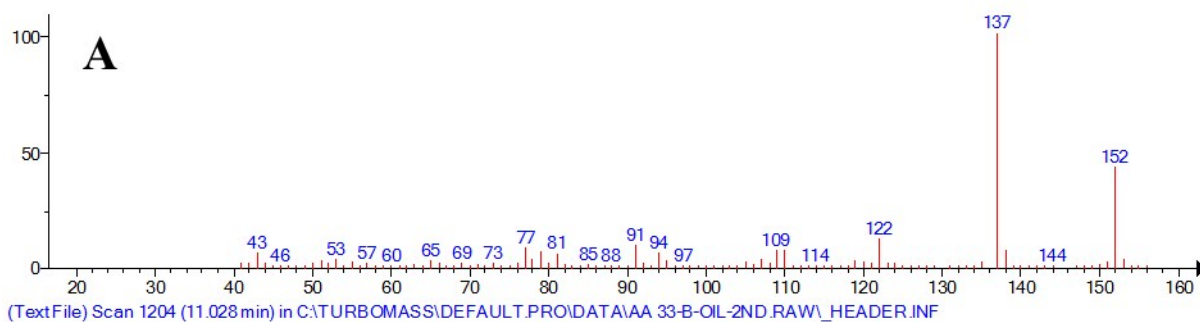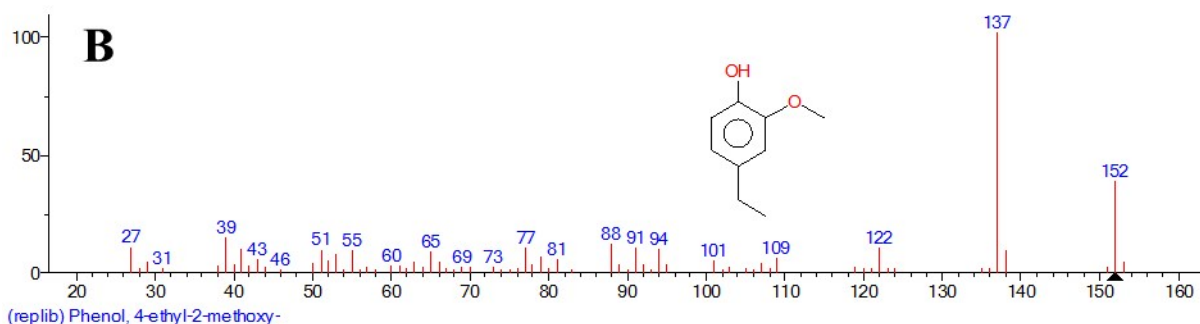

**SI Figure 6:** Matching MS spectrum of peak 11.03 MS in crude bio-oil GC-MS: A) MS of peak 11.03 in crude bio-oil sample; B) MS of Phenol, 4-ethyl-2-methoxy- according to NIST library.

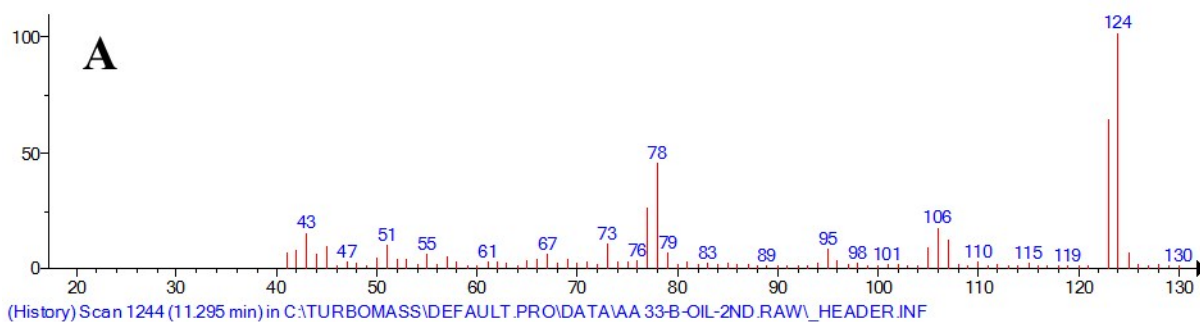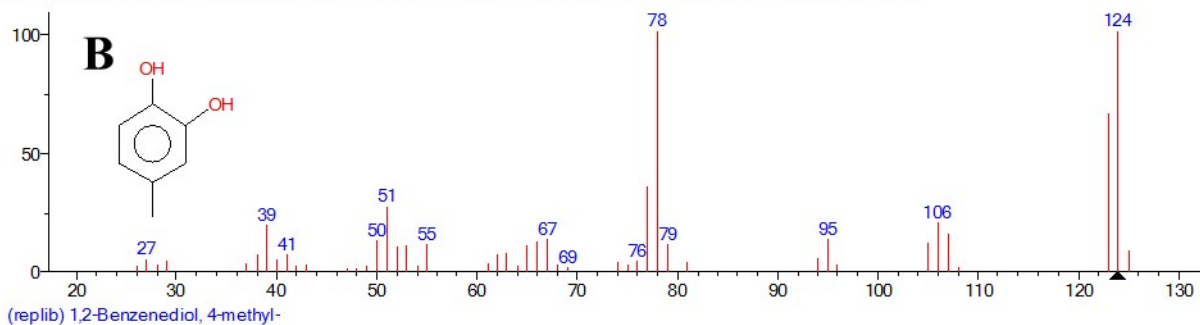

**SI Figure 7:** Matching MS spectrum of peak 11.30 MS in crude bio-oil GC-MS: A) MS of peak 11.30 in crude bio-oil sample; B) MS of 1,2-Benzenediol, 4-methyl- according to NIST library.

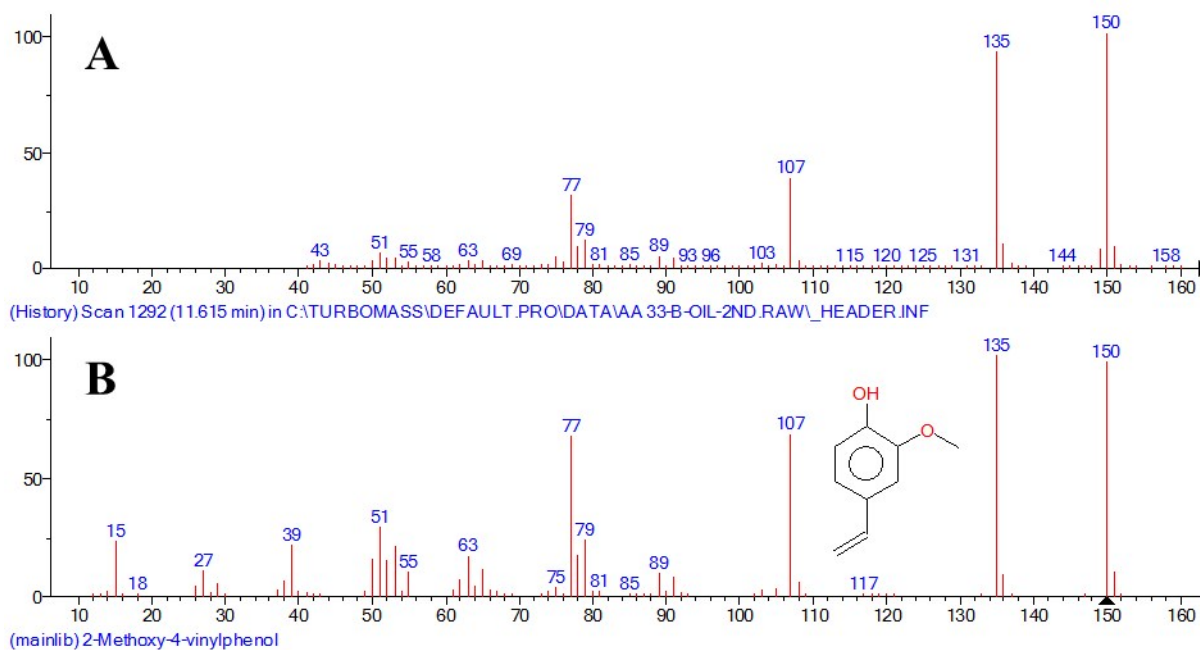

**SI Figure 8:** Matching MS spectrum of peak 11.62 MS in crude bio-oil GC-MS: A) MS of peak 11.62 in crude bio-oil sample; B) MS of 2-Methoxy-4-vinylphenol according to NIST library.

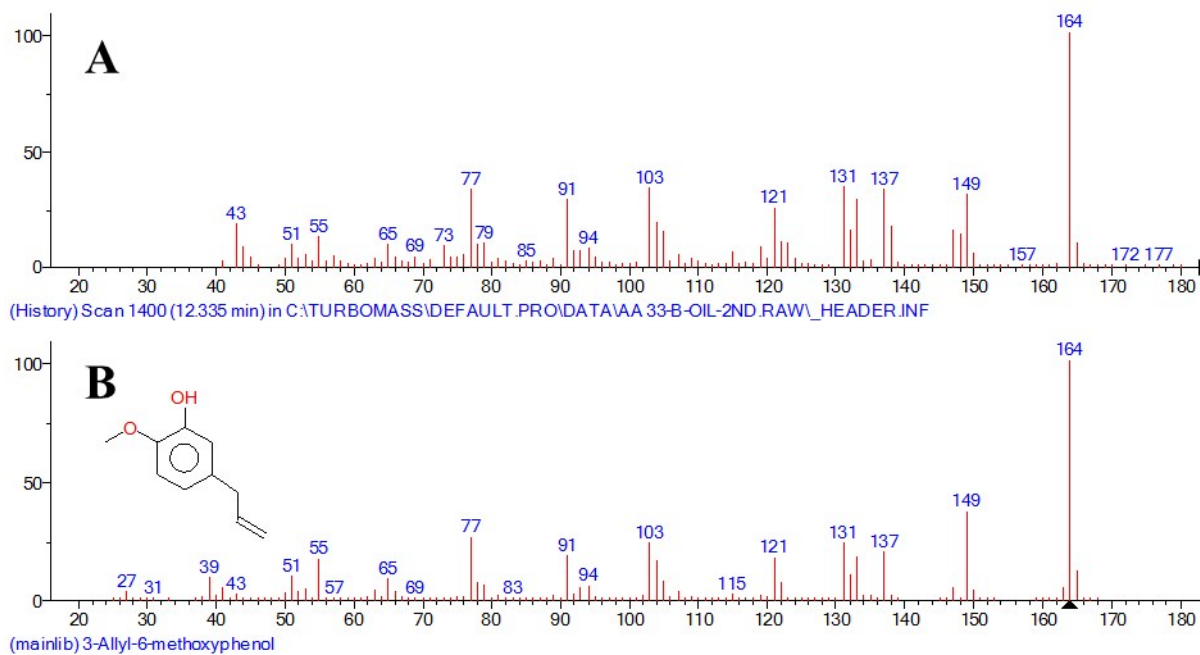

**SI Figure 9:** Matching MS spectrum of peak 12.33 MS in crude bio-oil GC-MS: A) MS of peak 12.33 in crude bio-oil sample; B) MS of 3-Allyl-6-methoxyphenol according to NIST library.

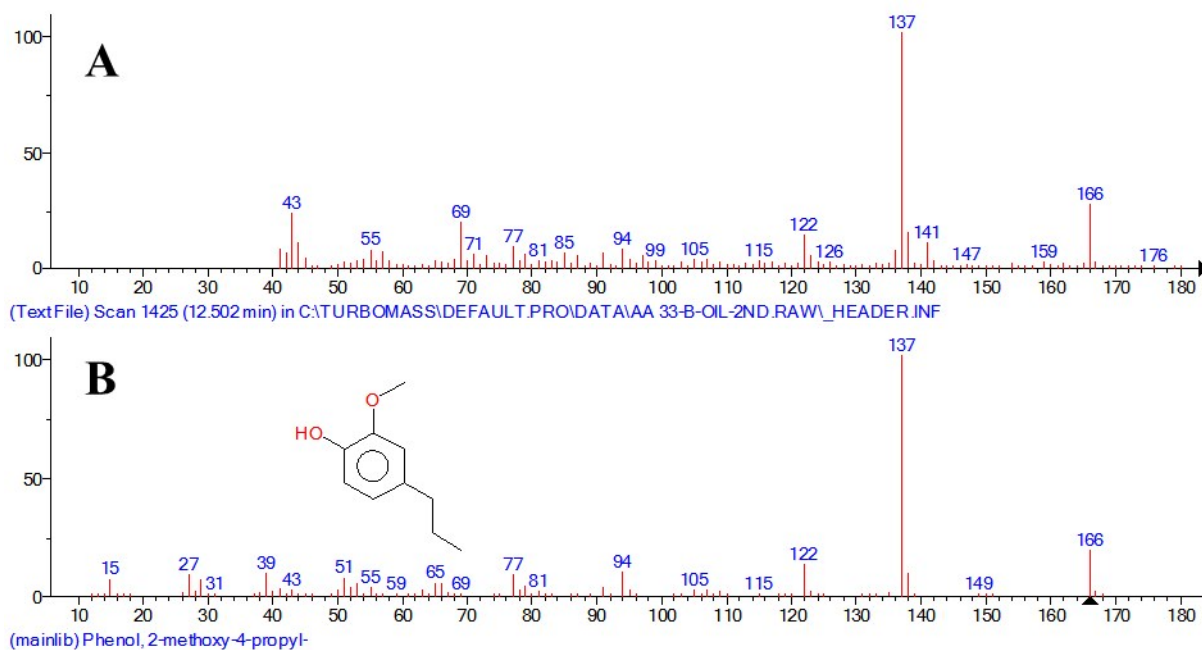

**SI Figure 10:** Matching MS spectrum of peak 12.50 MS in crude bio-oil GC-MS: A) MS of peak 12.50 in crude bio-oil sample; B) MS of Phenol, 2-methoxy-4-propyl- according to NIST library.

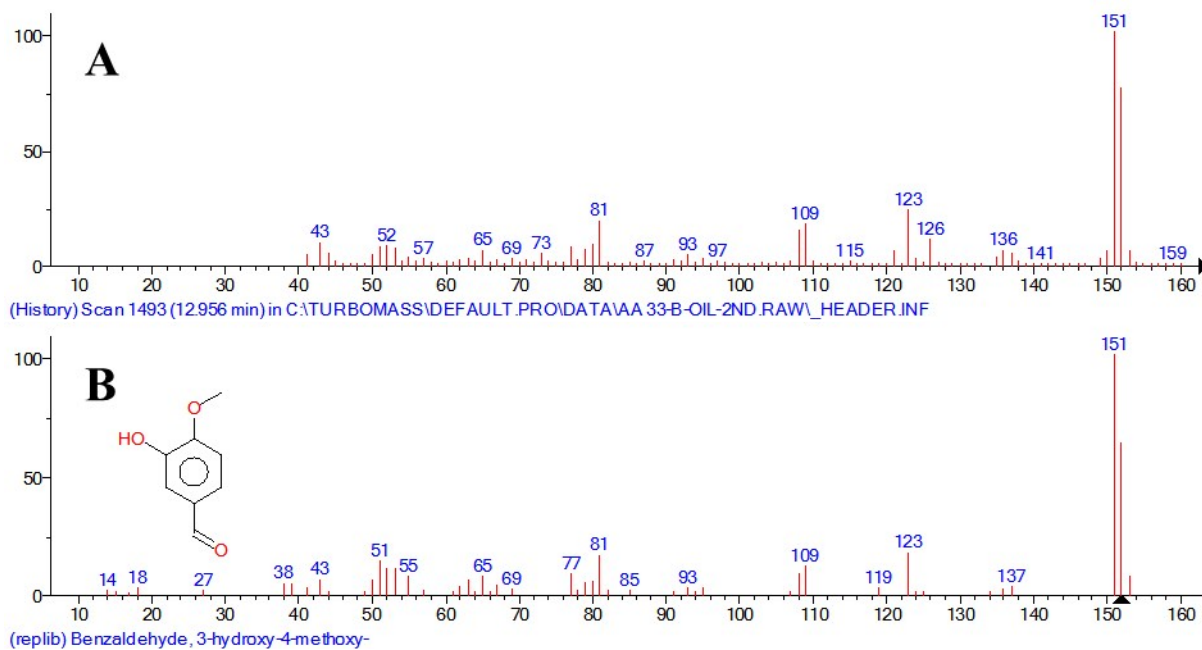

**SI Figure 11:** Matching MS spectrum of peak 12.96 MS in crude bio-oil GC-MS: A) MS of peak 12.96 in crude bio-oil sample; B) MS of Benzaldehyde, 3-hydroxy-4-methoxy- according to NIST library.

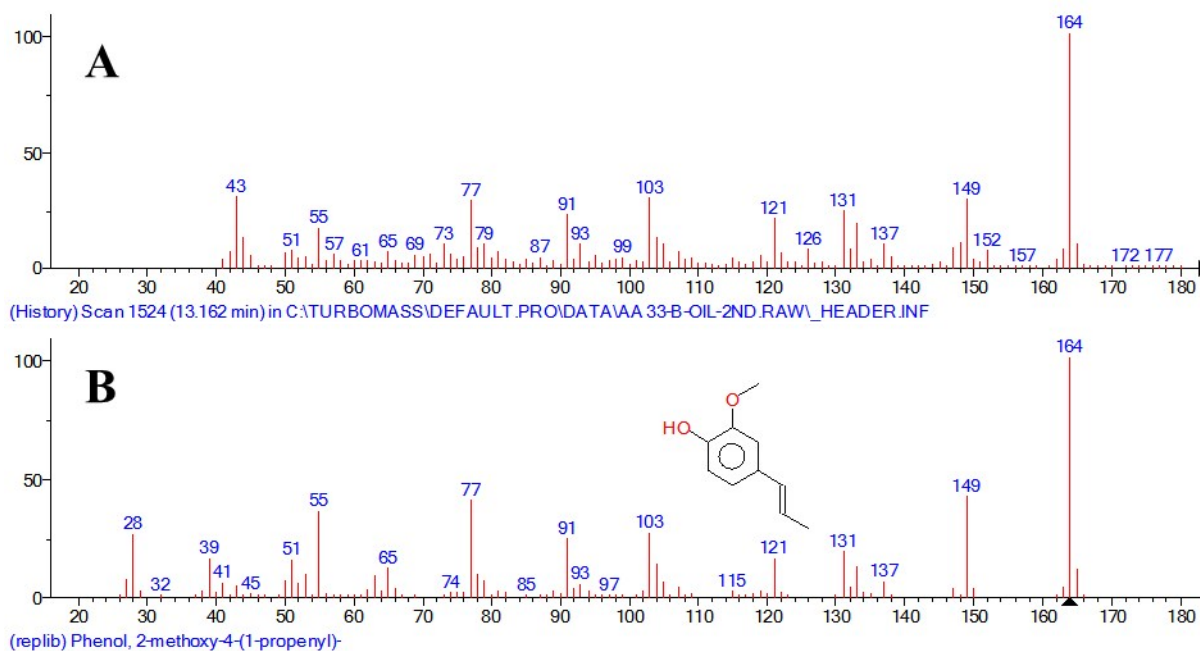

**SI Figure 12:** Matching MS spectrum of peak 13.16 MS in crude bio-oil GC-MS: A) MS of peak 13.16 in crude bio-oil sample; B) MS of Phenol, 2-methoxy-4-(1-propenyl)- according to NIST library.

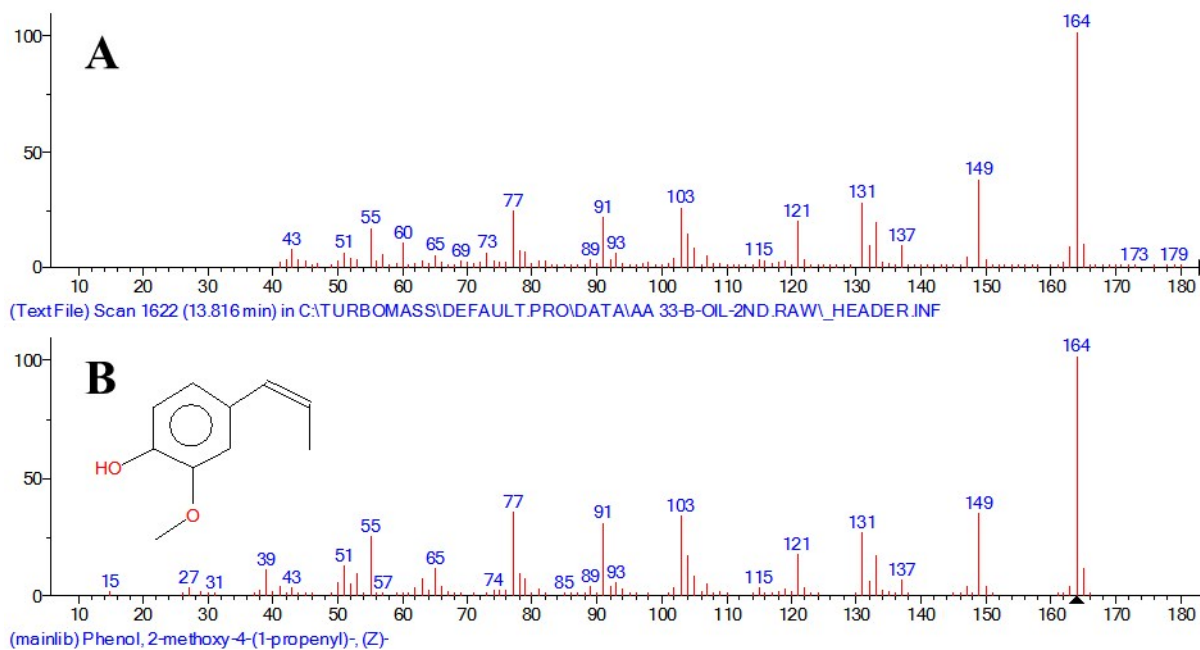

**SI Figure 13:** Matching MS spectrum of peak 13.82 MS in crude bio-oil GC-MS: A) MS of peak 13.82 in crude bio-oil sample; B) MS of Phenol, 2-methoxy-4-(1-propenyl)-, (Z)- according to NIST library.

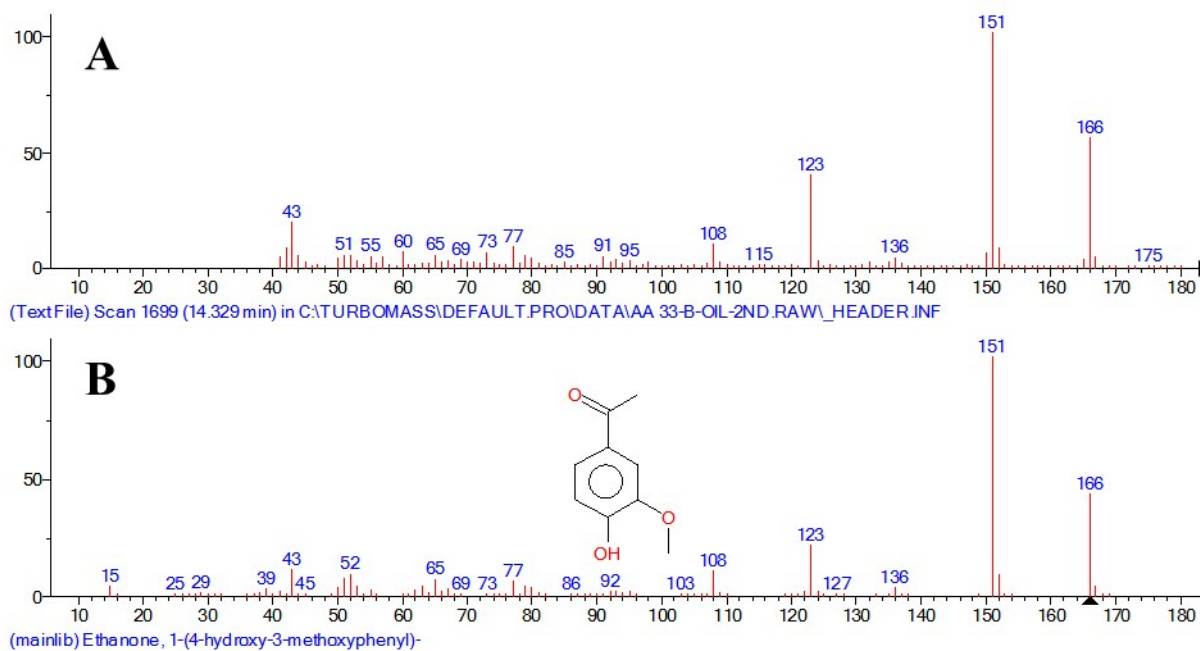

**SI Figure 14:** Matching MS spectrum of peak 14.34 MS in crude bio-oil GC-MS: A) MS of peak 14.34 in crude bio-oil sample; B) MS of Ethanone, 1-(4-hydroxy-3-methoxyphenyl)- according to NIST library.

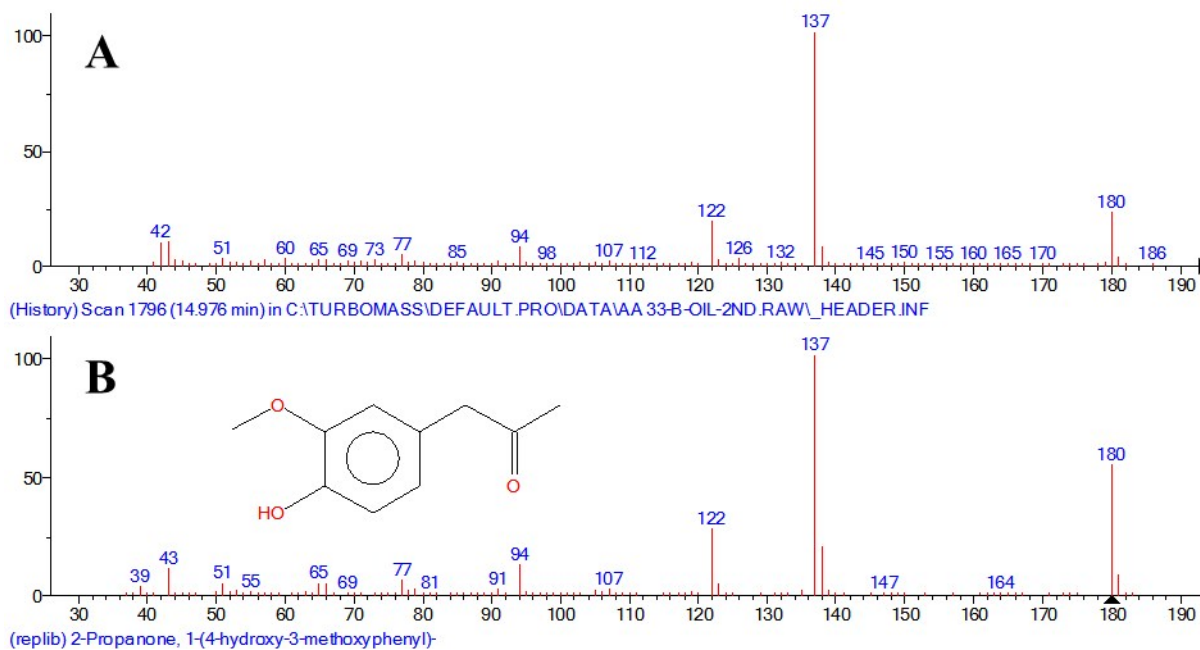

**SI Figure 15:** Matching MS spectrum of peak 14.98 MS in crude bio-oil GC-MS: A) MS of peak 14.98 in crude bio-oil sample; B) MS of 2-Propanone, 1-(4-hydroxy-3-methoxyphenyl)- according to NIST library.



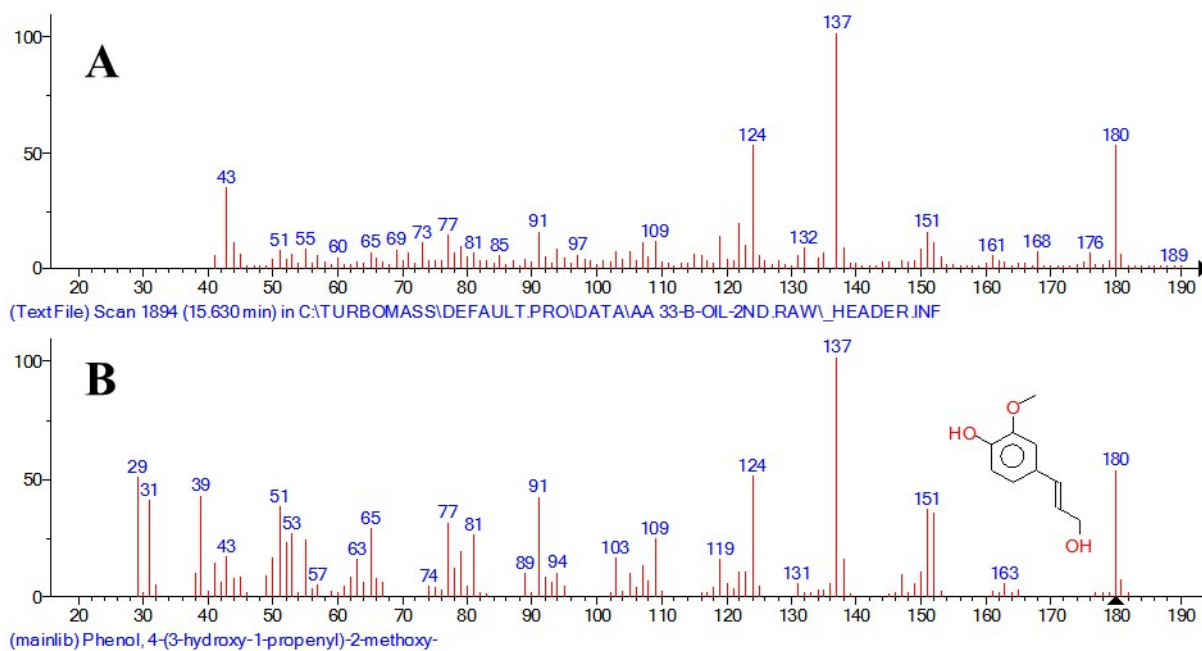

**SI Figure 16:** Matching MS spectrum of peak 15.63 MS in crude bio-oil GC-MS: A) MS of peak 15.63 in crude bio-oil sample; B) MS of Phenol, 4-(3-hydroxy-1-propenyl)-2-methoxy- according to NIST library.

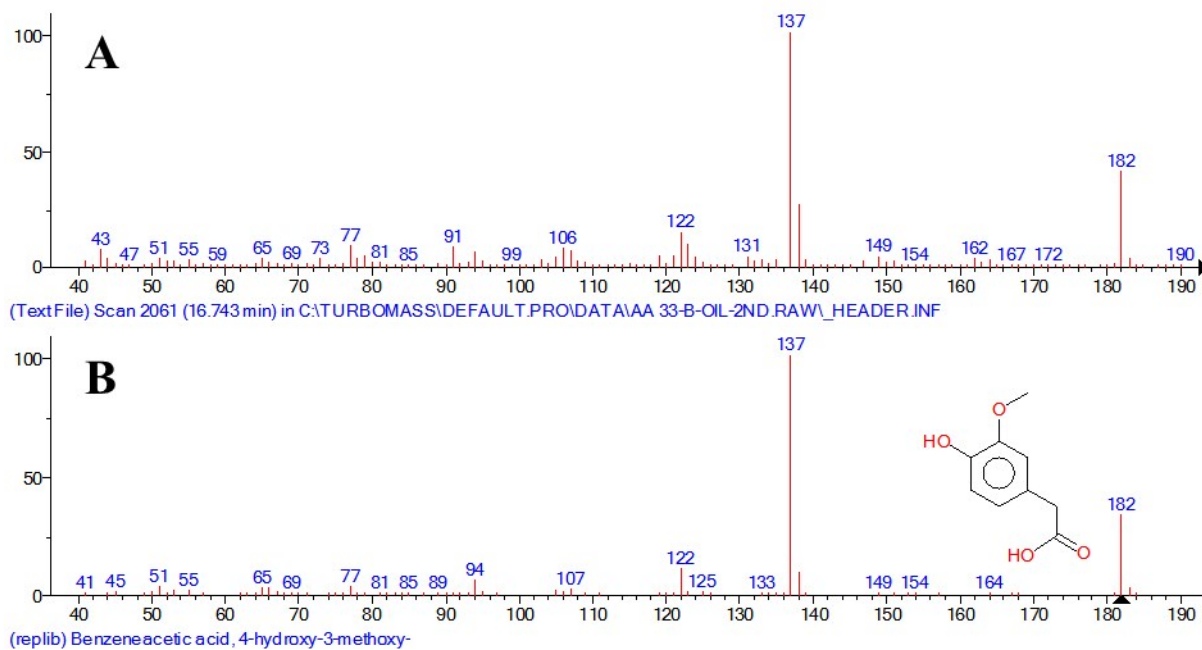

**SI Figure 17:** Matching MS spectrum of peak 16.74 MS in crude bio-oil GC-MS: A) MS of peak 16.74 in crude bio-oil sample; B) MS of Benzeneacetic acid, 4-hydroxy-3-methoxy- according to NIST library.

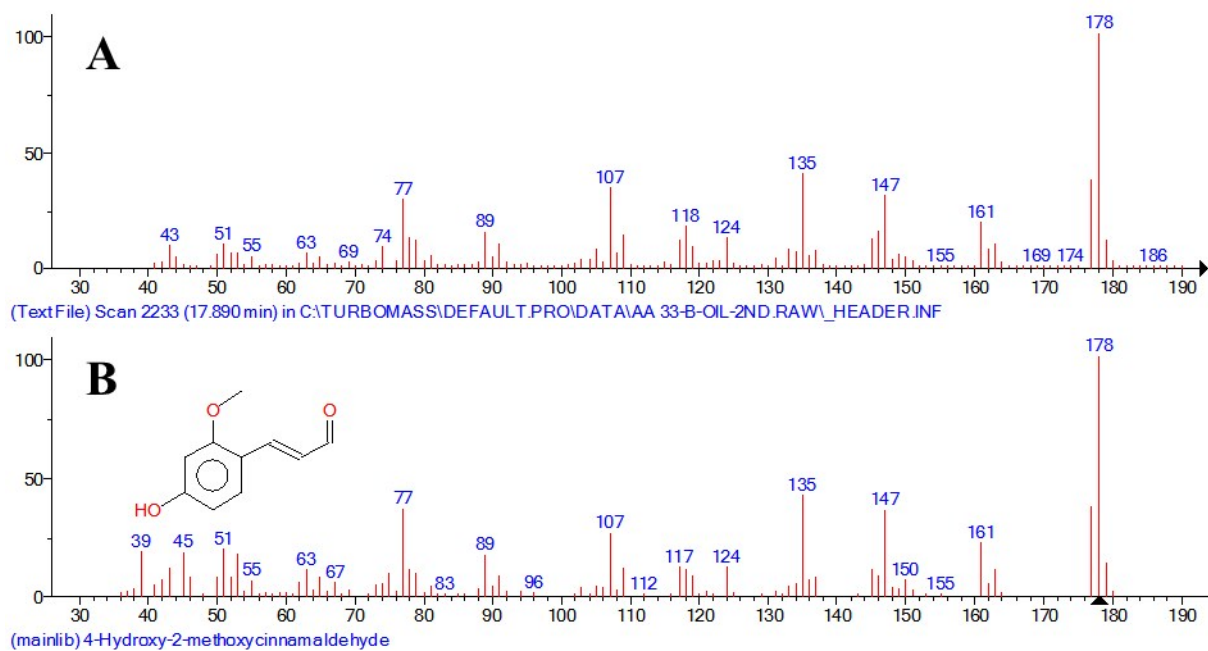

**SI Figure 18:** Matching MS spectrum of peak 17.89 MS in crude bio-oil GC-MS: A) MS of peak 17.89 in crude bio-oil sample; B) MS of 4-Hydroxy-2-methoxycinnamaldehyde according to NIST library.

Water-soluble extract MS of Identified phenols and their best MS match from NIST Spectral library.

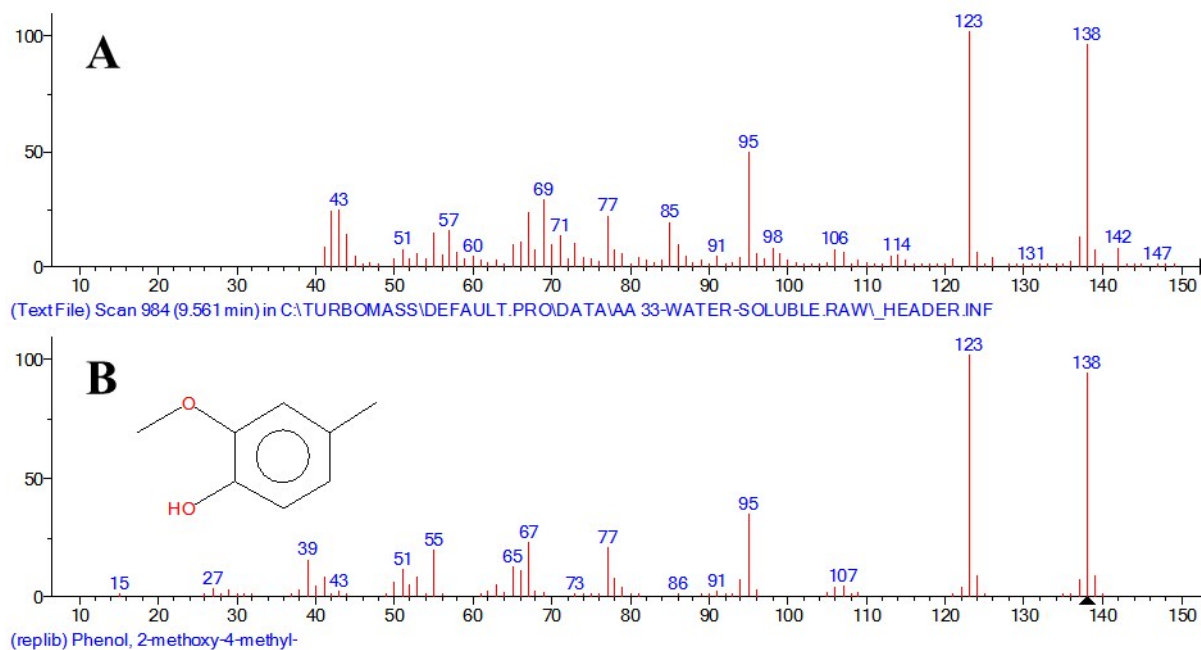

**SI Figure 19:** Matching MS spectrum of peak 9.55 MS in water-soluble extract GC-MS: A) MS of peak 9.55 in water-soluble extract sample; B) MS of Phenol, 2-methoxy-4-methyl- according to NIST library.

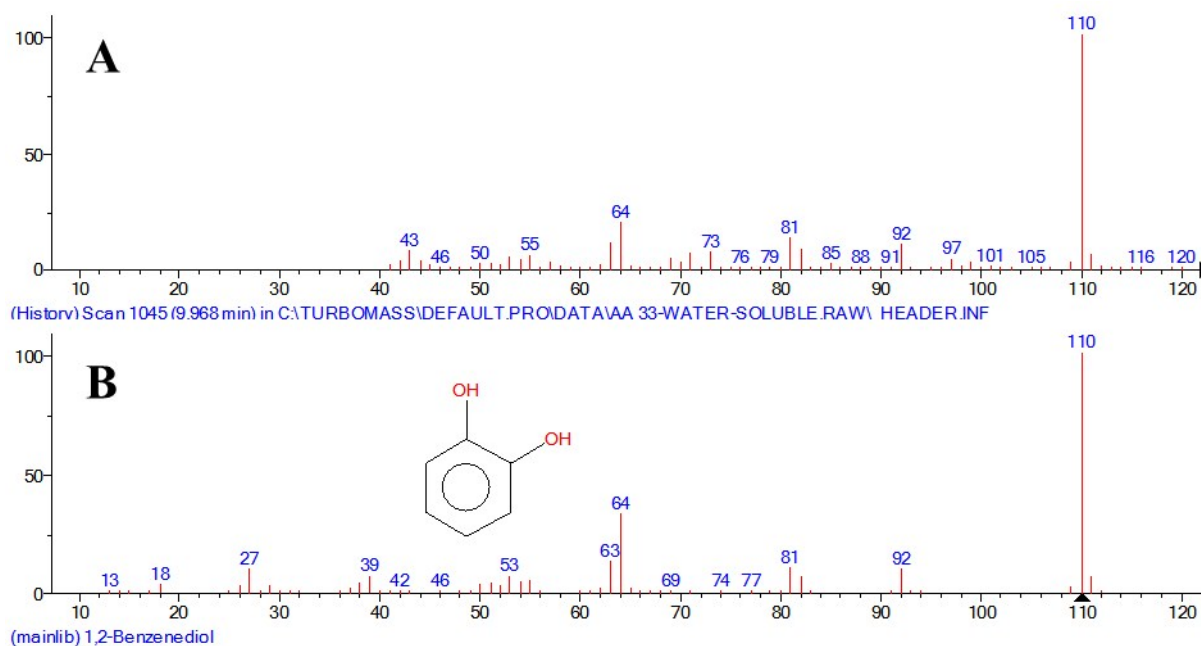

**SI Figure 20:** Matching MS spectrum of peak 9.96 MS in water-soluble extract GC-MS: A) MS of peak 9.96 in water-soluble extract sample; B) MS of 1,2-Benzenediol according to NIST library.

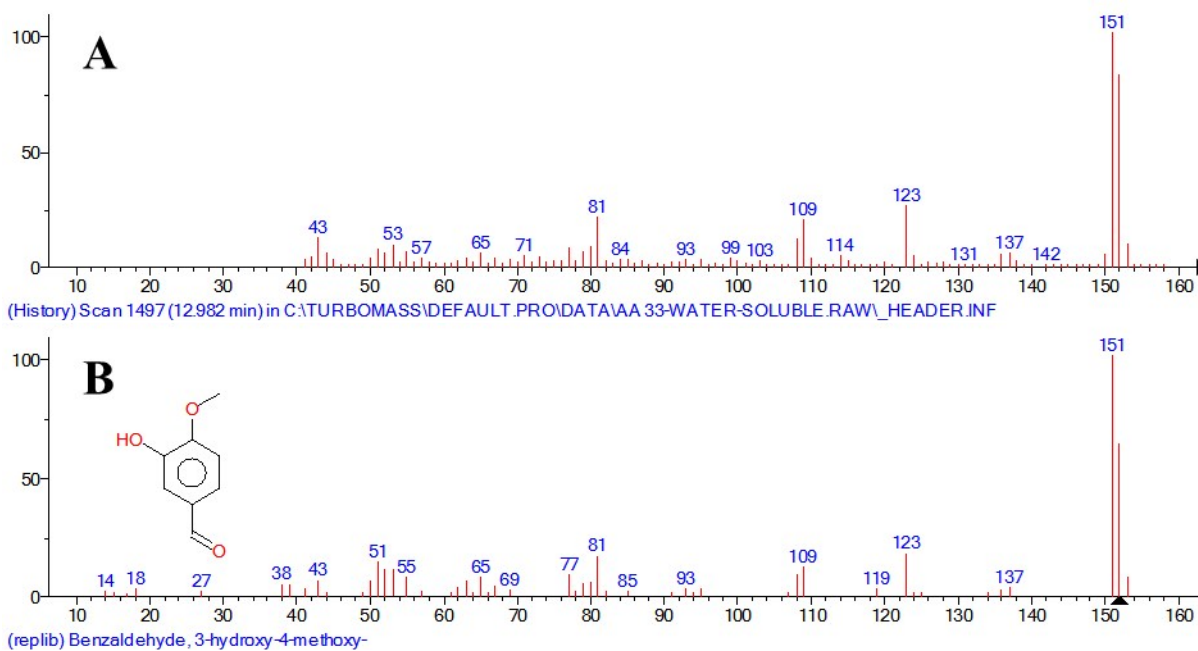

**SI Figure 21:** Matching MS spectrum of peak 12.98 MS in water-soluble extract GC-MS: A) MS of peak 12.98 in water-soluble extract sample; B) MS of Benzaldehyde, 3-hydroxy-4-methoxy- according to NIST library.

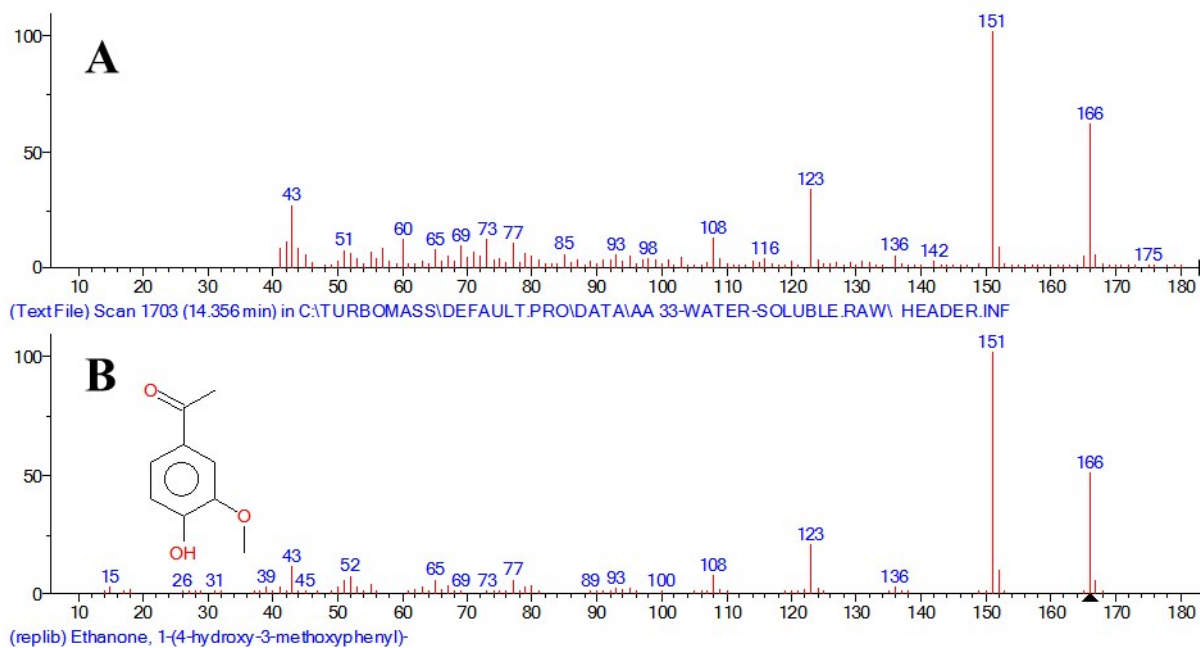

**SI Figure 22:** Matching MS spectrum of peak 14.35 MS in water-soluble extract GC-MS: A) MS of peak 14.35 in water-soluble extract sample; B) MS of Ethanone, 1-(4-hydroxy-3-methoxyphenyl)- according to NIST library.

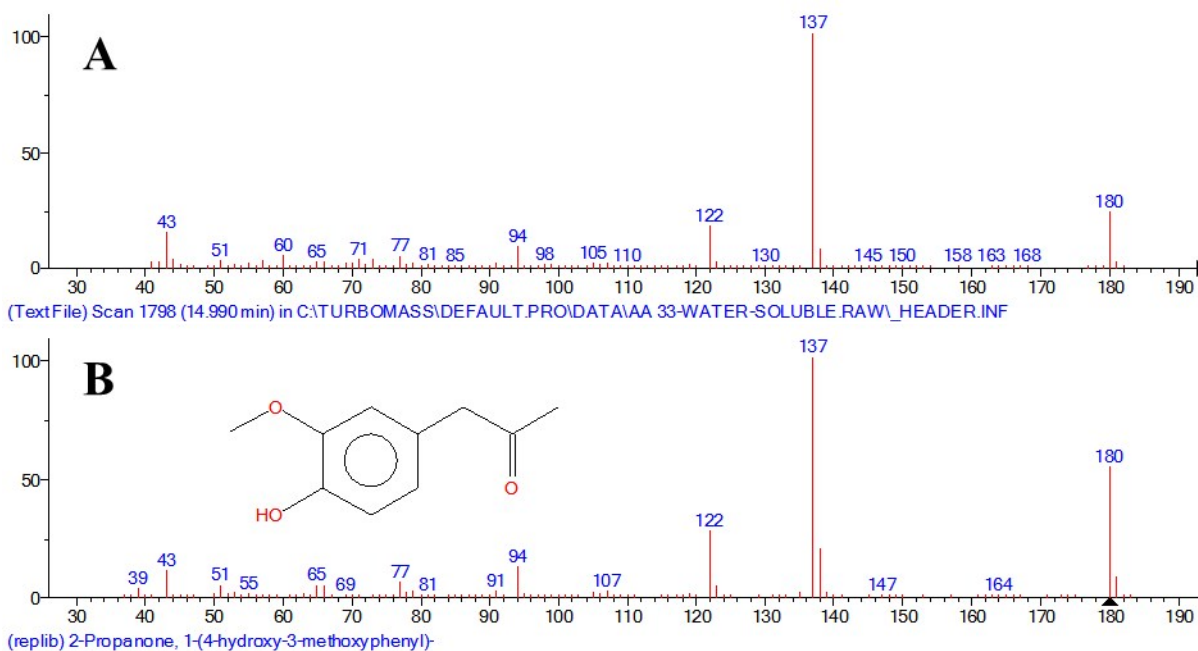

**SI Figure 23:** Matching MS spectrum of peak 14.99 MS in water-soluble extract GC-MS: A) MS of peak 14.99 in water-soluble extract sample; B) MS of 2-Propanone, 1-(4-hydroxy-3-methoxyphenyl)- according to NIST library.

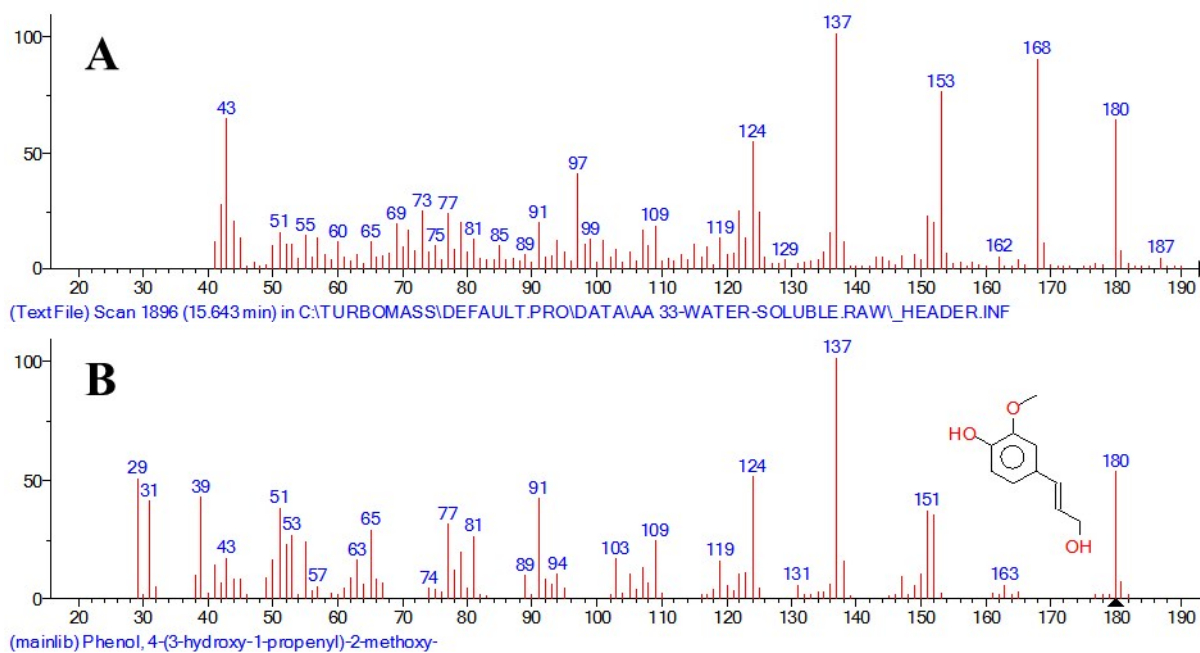

**SI Figure 24:** Matching MS spectrum of peak 15.64 MS in water-soluble extract GC-MS: A) MS of peak 15.64 in water-soluble extract sample; B) MS of Phenol, 4-(3-hydroxy-1-propenyl)-2-methoxy- according to NIST library.

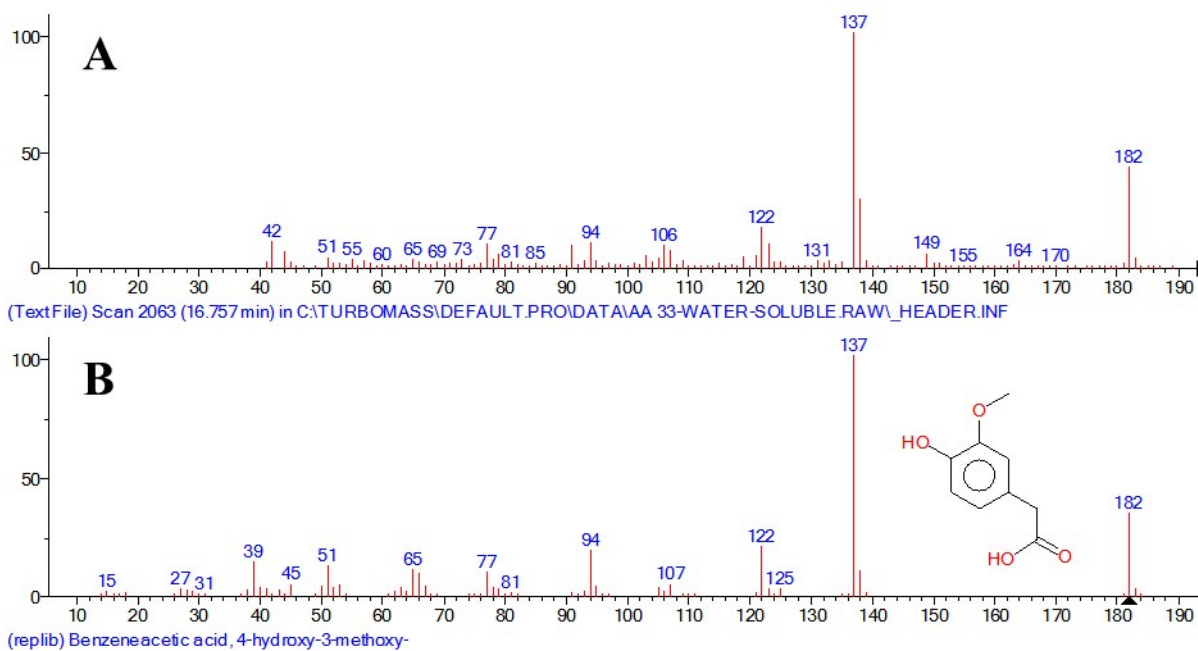

**SI Figure 25:** Matching MS spectrum of peak 16.76 MS in water-soluble extract GC-MS: A) MS of peak 16.76 in water-soluble extract sample; B) MS of Benzeneacetic acid, 4-hydroxy-3-methoxy- according to NIST library.

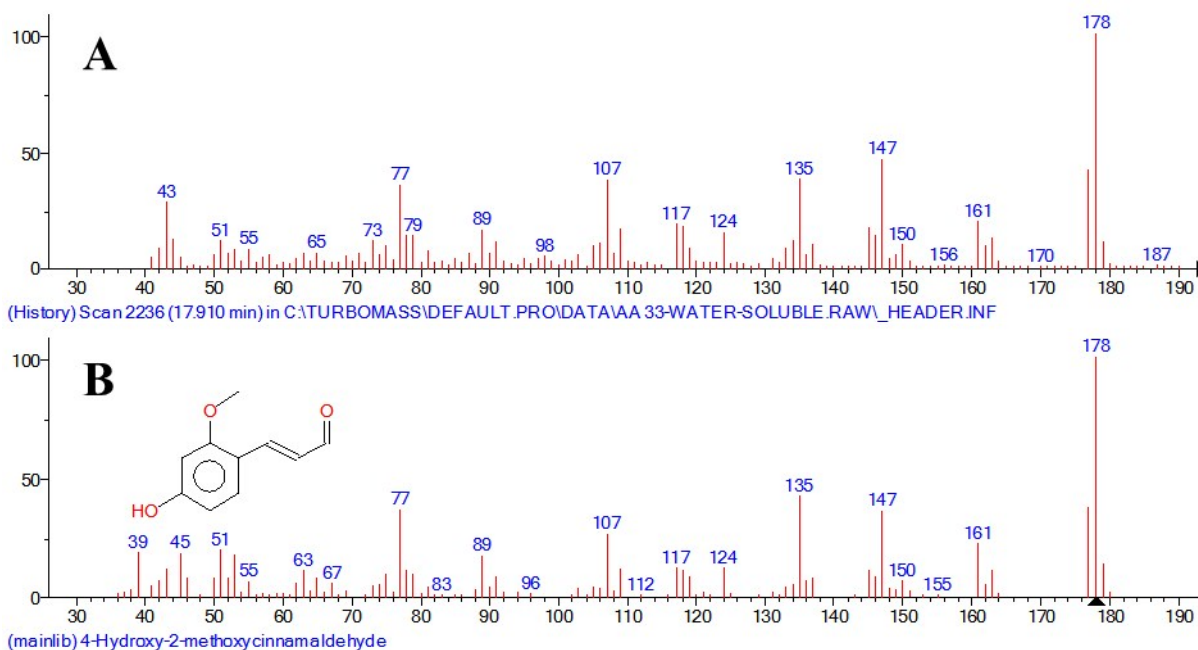

**SI Figure 26:** Matching MS spectrum of peak 17.91 MS in water-soluble extract GC-MS: A) MS of peak 17.91 in water-soluble extract sample; B) MS of 4-Hydroxy-2-methoxycinnamaldehyde according to NIST library.

Neutral extract MS of Identified phenols and their best MS match from NIST Spectral library.

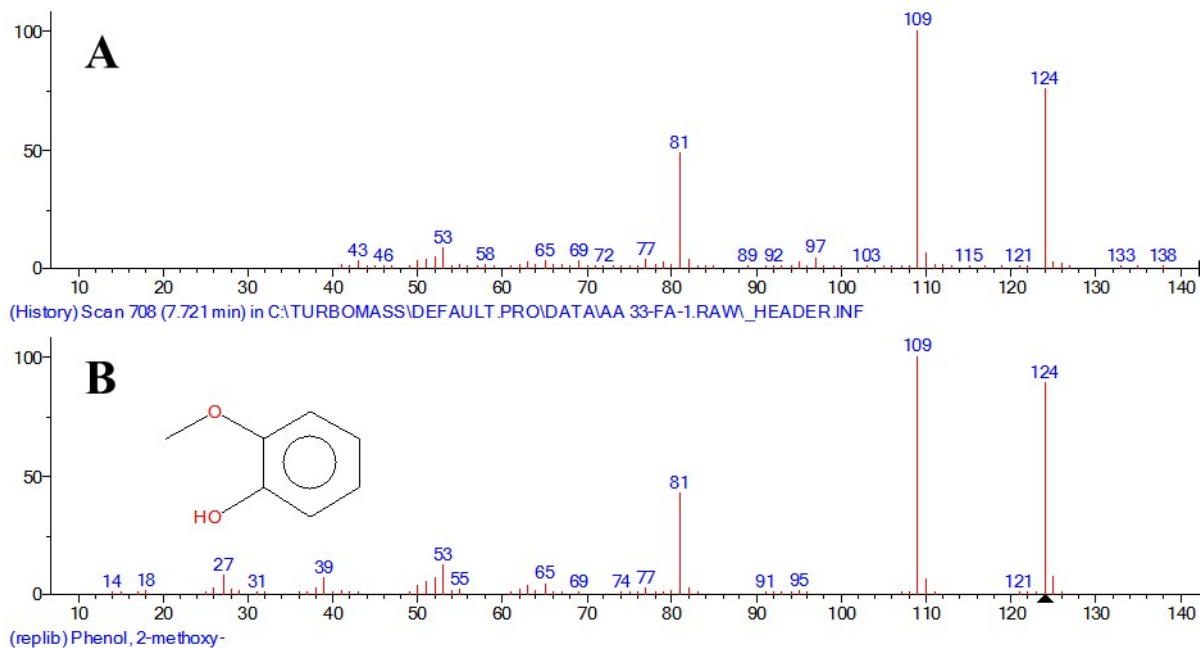

**SI Figure 27:** Matching MS spectrum of peak 7.72 MS in neutral extract GC-MS: A) MS of peak 7.72 in neutral extract sample; B) MS of Phenol, 2-methoxy- according to NIST library.

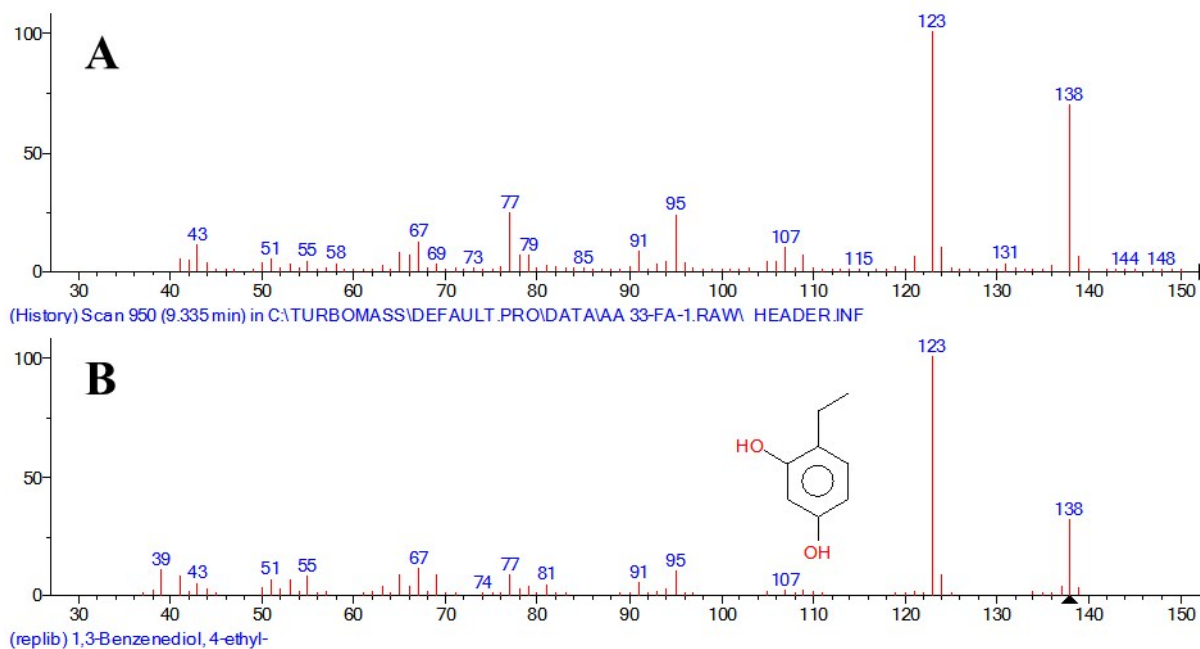

**SI Figure 28:** Matching MS spectrum of peak 9.33 MS in neutral extract GC-MS: A) MS of peak 9.33 in neutral extract sample; B) MS of 1,3-Benzenediol, 4-ethyl- according to NIST library.

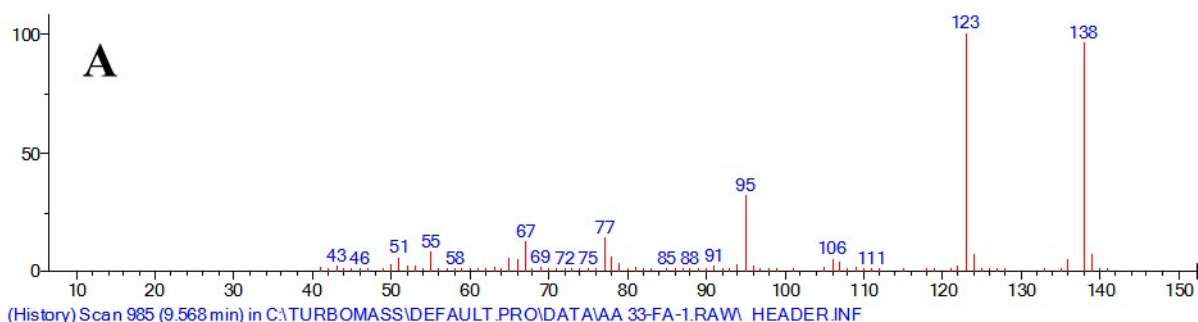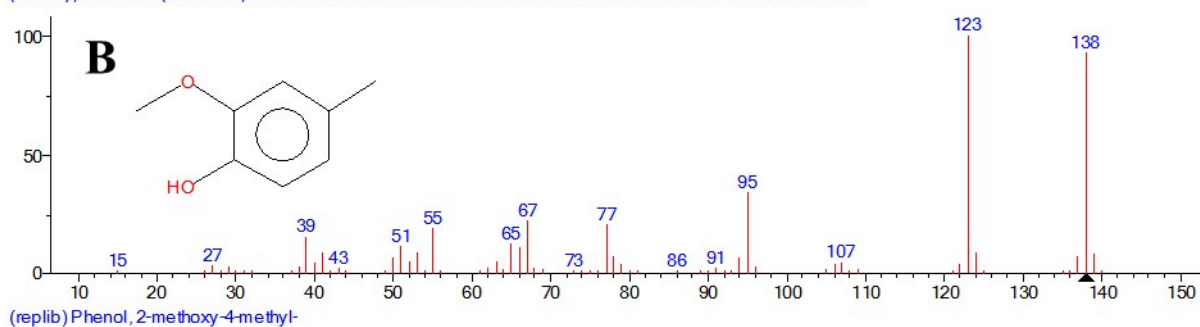

**SI Figure 29:** Matching MS spectrum of peak 9.57 MS in neutral extract GC-MS: A) MS of peak 9.57 in neutral extract sample; B) MS of Phenol, 2-methoxy-4-methyl- according to NIST library.

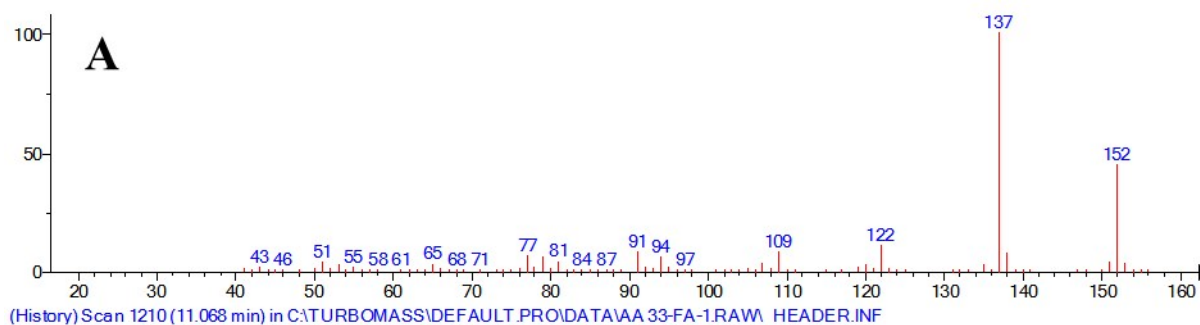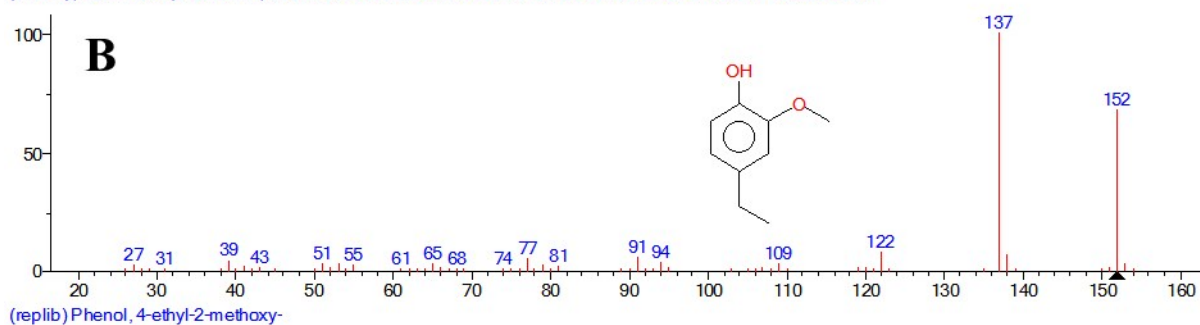

**SI Figure 30:** Matching MS spectrum of peak 11.07 MS in neutral extract GC-MS: A) MS of peak 11.07 in neutral extract sample; B) MS of Phenol, 4-ethyl-2-methoxy- according to NIST library.



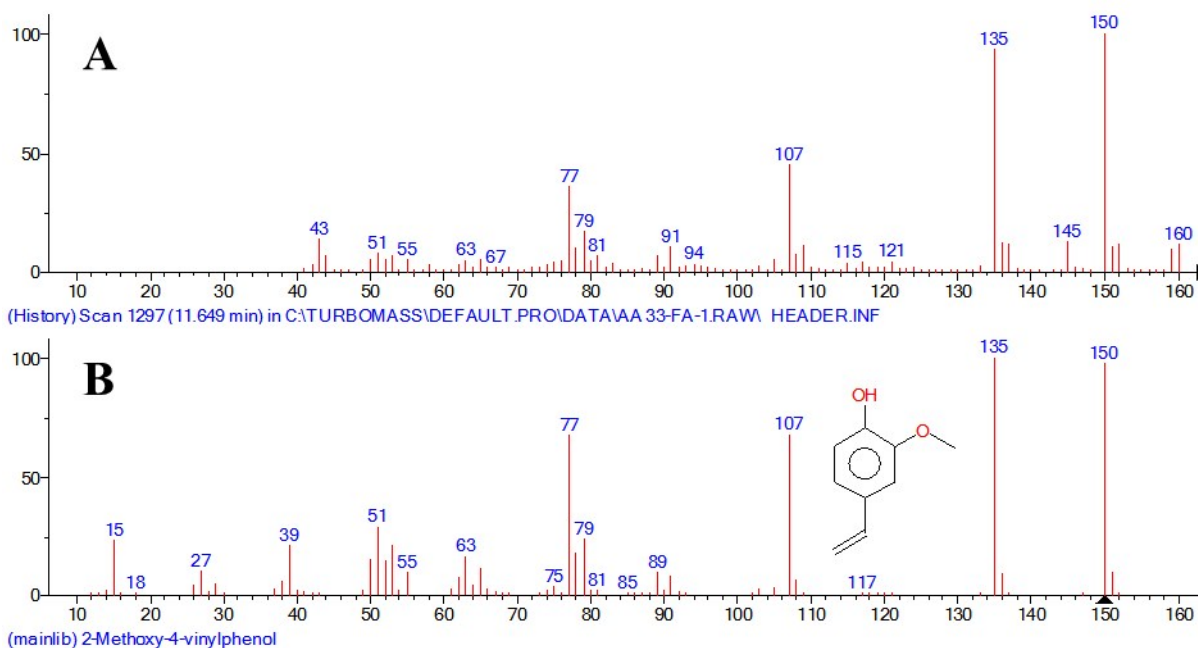

**SI Figure 31:** Matching MS spectrum of peak 11.65 MS in neutral extract GC-MS: A) MS of peak 11.65 in neutral extract sample; B) MS of 2-Methoxy-4-vinylphenol according to NIST library.

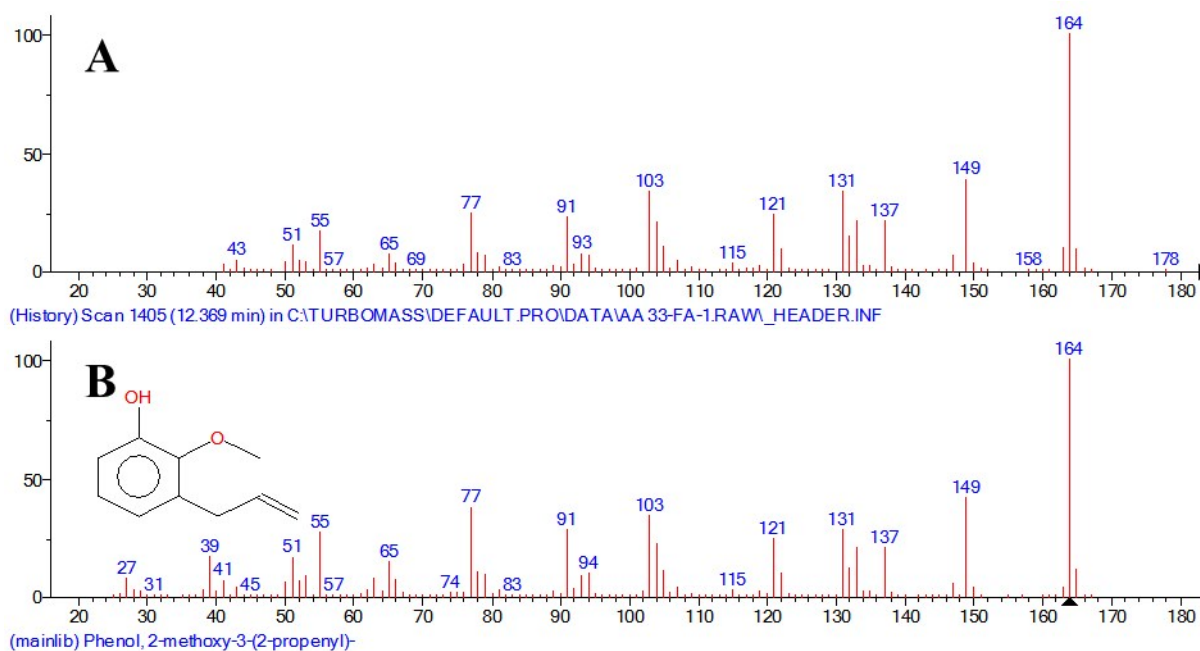

**SI Figure 32:** Matching MS spectrum of peak 12.37 MS in neutral extract GC-MS: A) MS of peak 12.37 in neutral extract sample; B) MS of 3-Allyl-6-methoxyphenol according to NIST library.

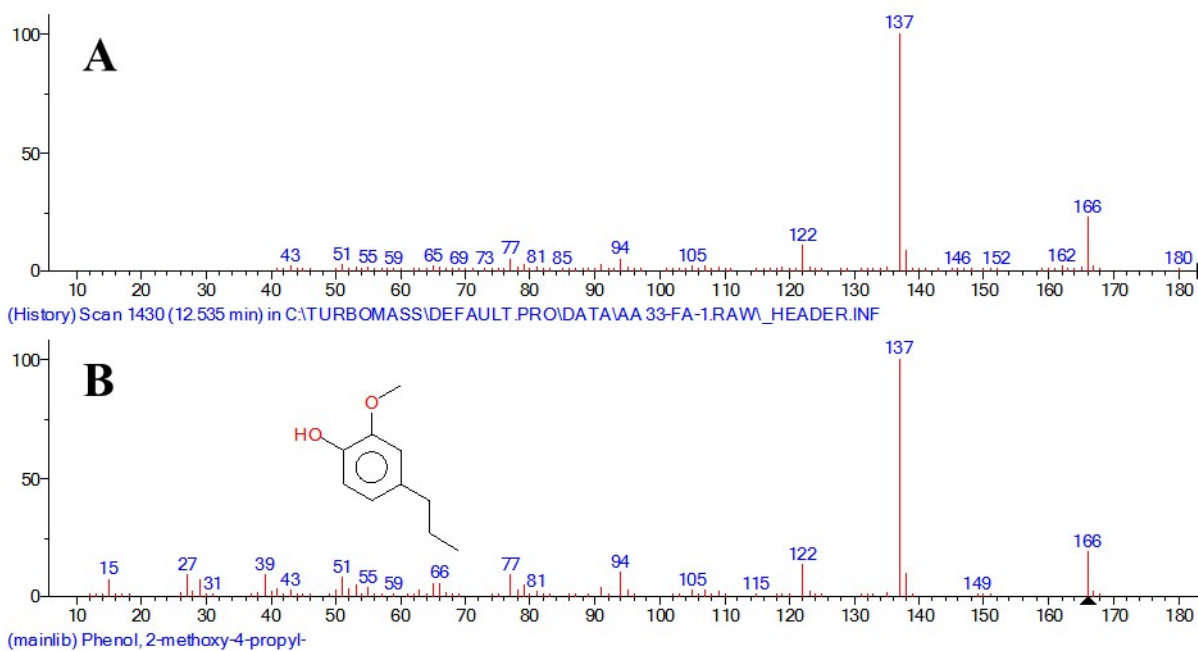

**SI Figure 33:** Matching MS spectrum of peak 12.54 MS in neutral extract GC-MS: A) MS of peak 12.54 in neutral extract sample; B) MS of Phenol, 2-methoxy-4-propyl- according to NIST library.

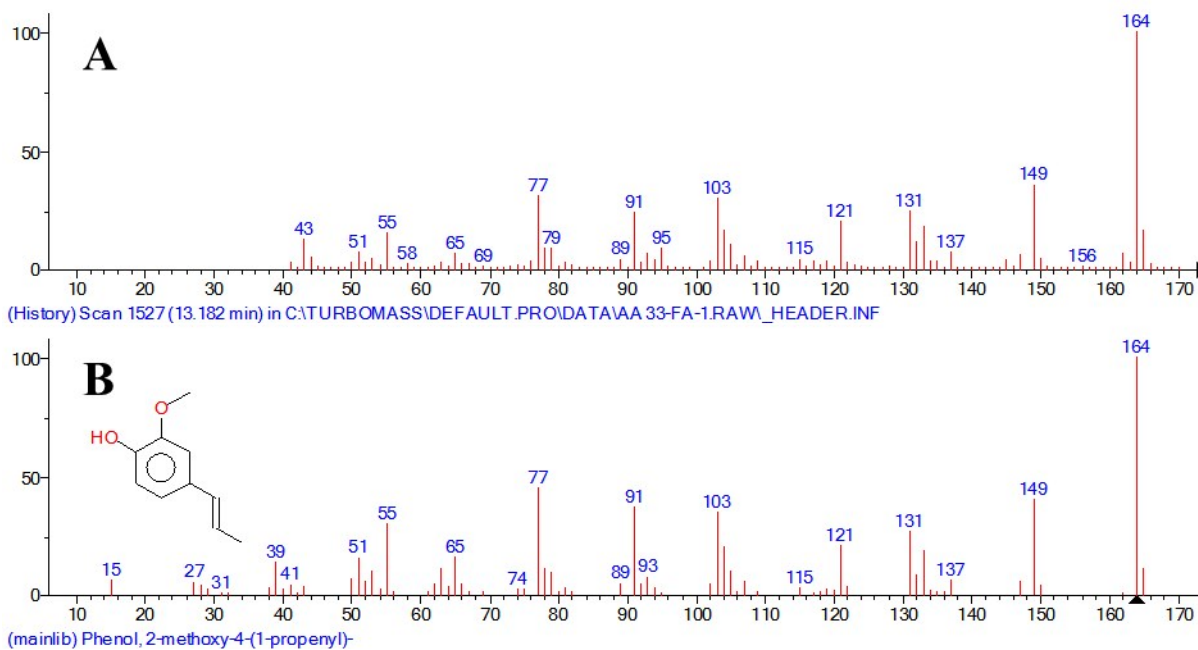

**SI Figure 34:** Matching MS spectrum of peak 13.18 MS in neutral extract GC-MS: A) MS of peak 13.18 in neutral extract sample; B) MS of Phenol, 2-methoxy-4-(1-propenyl)- according to NIST library.

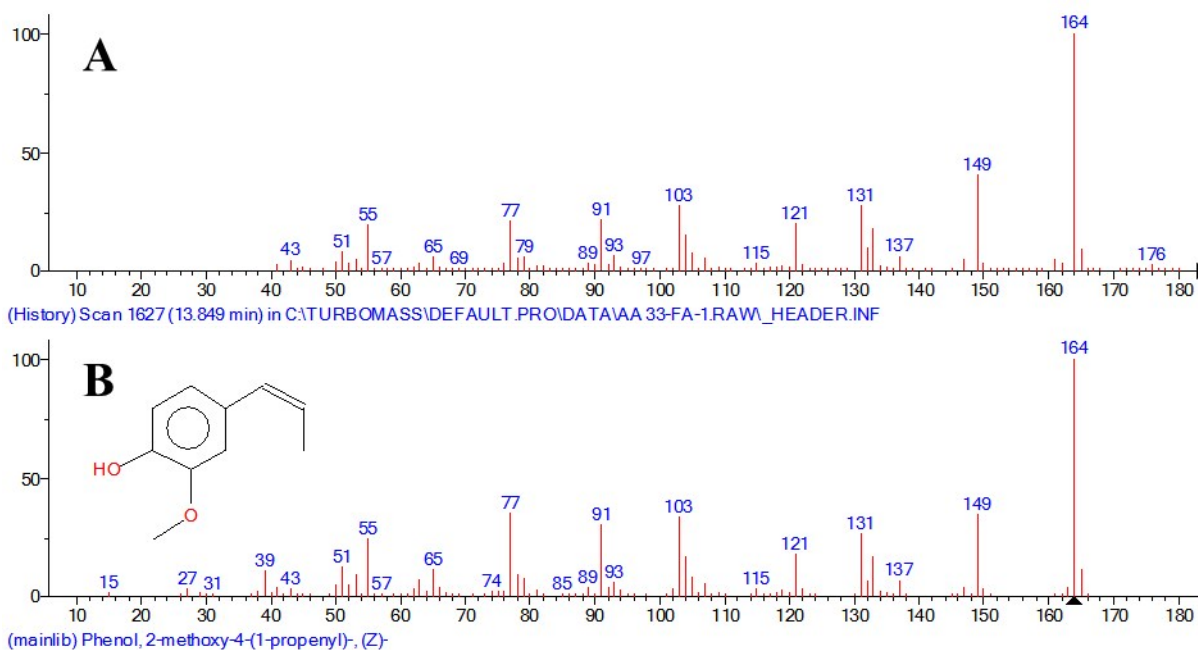

**SI Figure 35:** Matching MS spectrum of peak 13.85 MS in neutral extract GC-MS: A) MS of peak 13.85 in neutral extract sample; B) MS of Phenol, 2-methoxy-4-(1-propenyl)-, (Z)- according to NIST library.

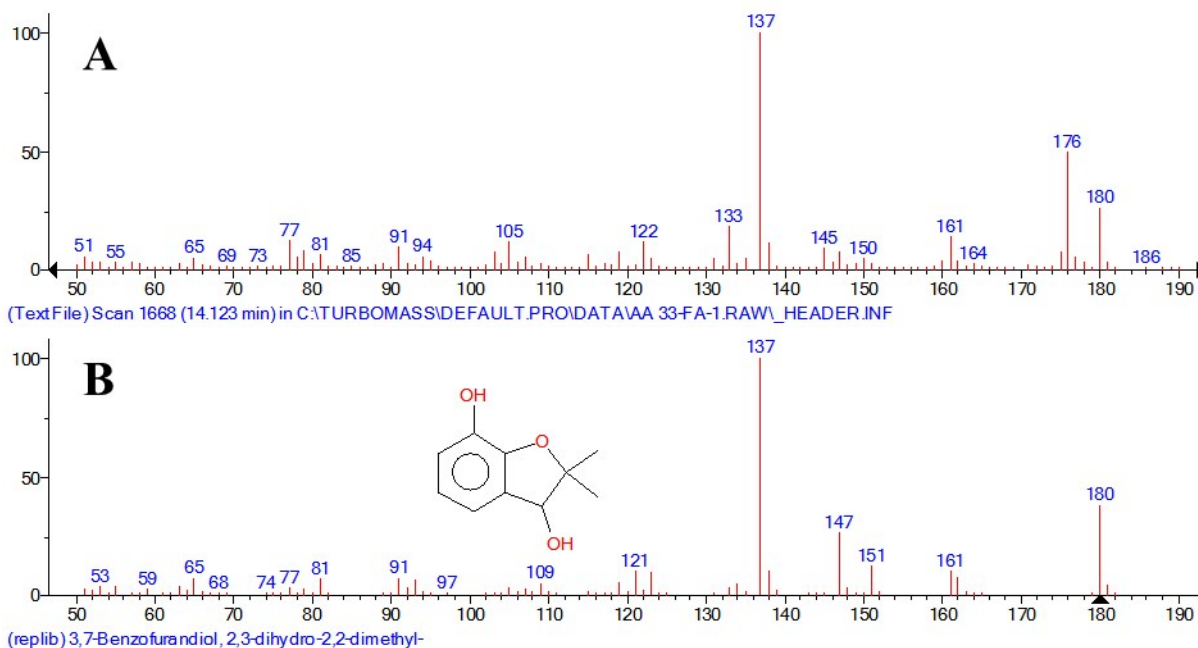

**SI Figure 36:** Matching MS spectrum of peak 14.12 MS in neutral extract GC-MS: A) MS of peak 14.12 in neutral extract sample; B) MS of 3,7-Benzofurandiyl, 2,3-dihydro-2,2-dimethyl- according to NIST library.

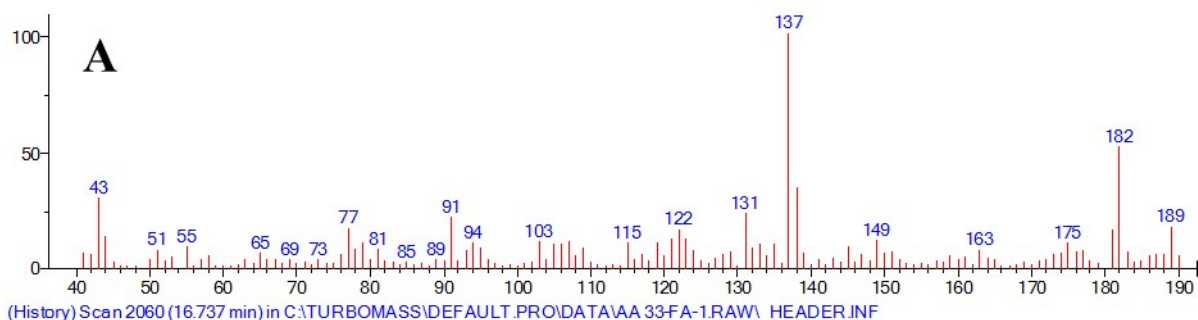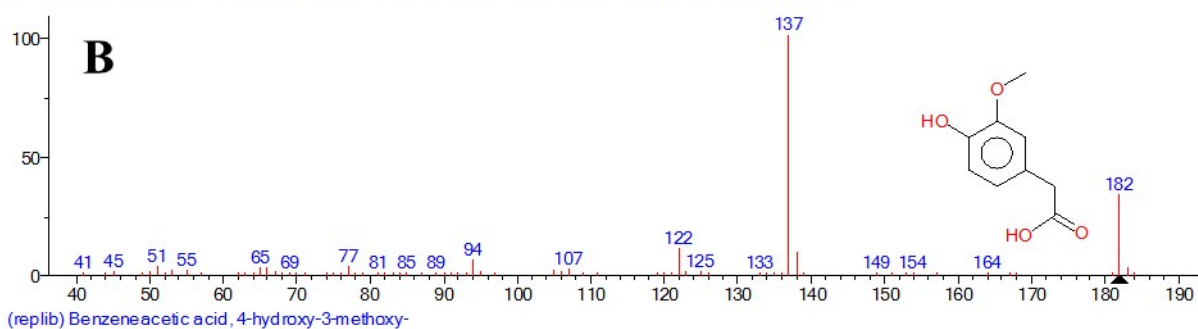

**SI Figure 37:** Matching MS spectrum of peak 16.74 MS in neutral extract GC-MS: A) MS of peak 16.74 in neutral extract sample; B) MS of Benzeneacetic acid, 4-hydroxy-3-methoxy- according to NIST library.

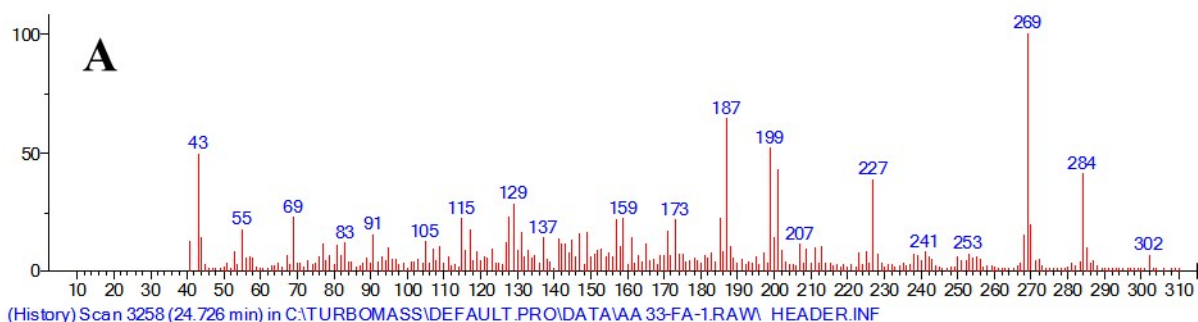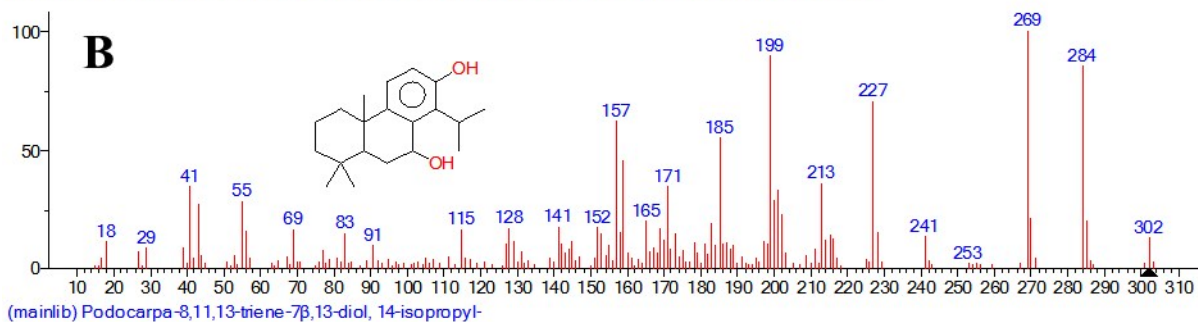

**SI Figure 38:** Matching MS spectrum of peak 24.73 MS in neutral extract GC-MS: A) MS of peak 24.73 in neutral extract sample; B) MS of Podocarpa-8,11,13-triene-7β,13-diol, 14-isopropyl- according to NIST library.

Phenolic extract MS of identified phenols and their best MS match from NIST Spectral library.

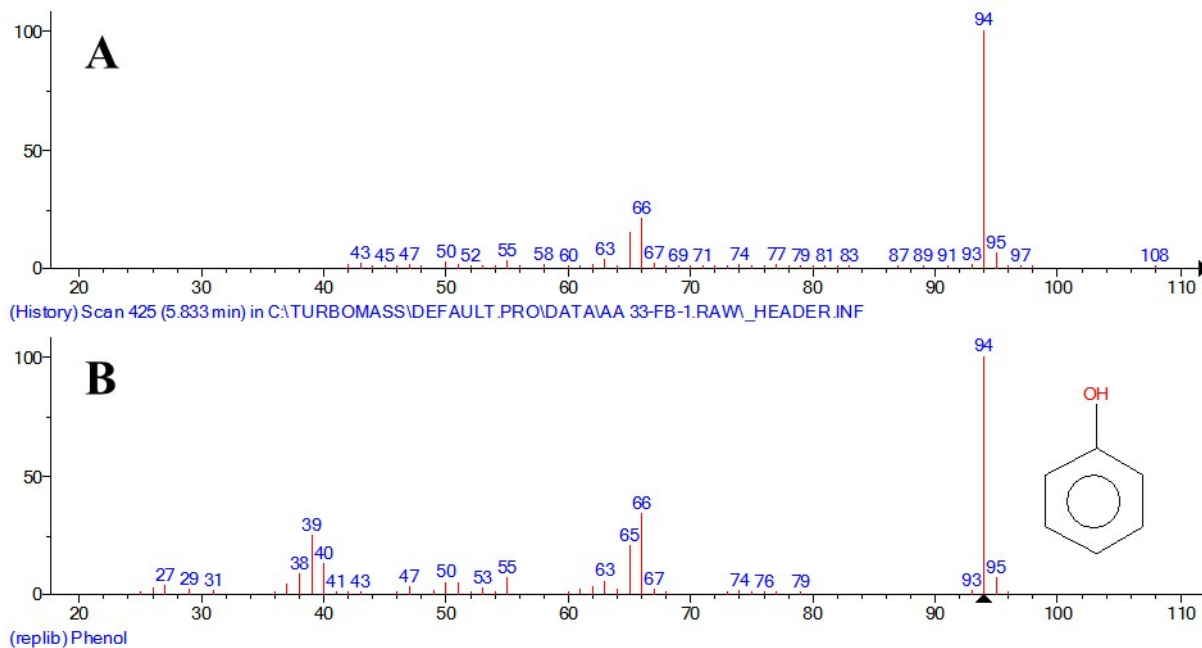

**SI Figure 39:** Matching MS spectrum of peak 5.83 MS in phenolic extract GC-MS: A) MS of peak 5.83 in phenolic extract sample; B) MS of Phenol according to NIST library.

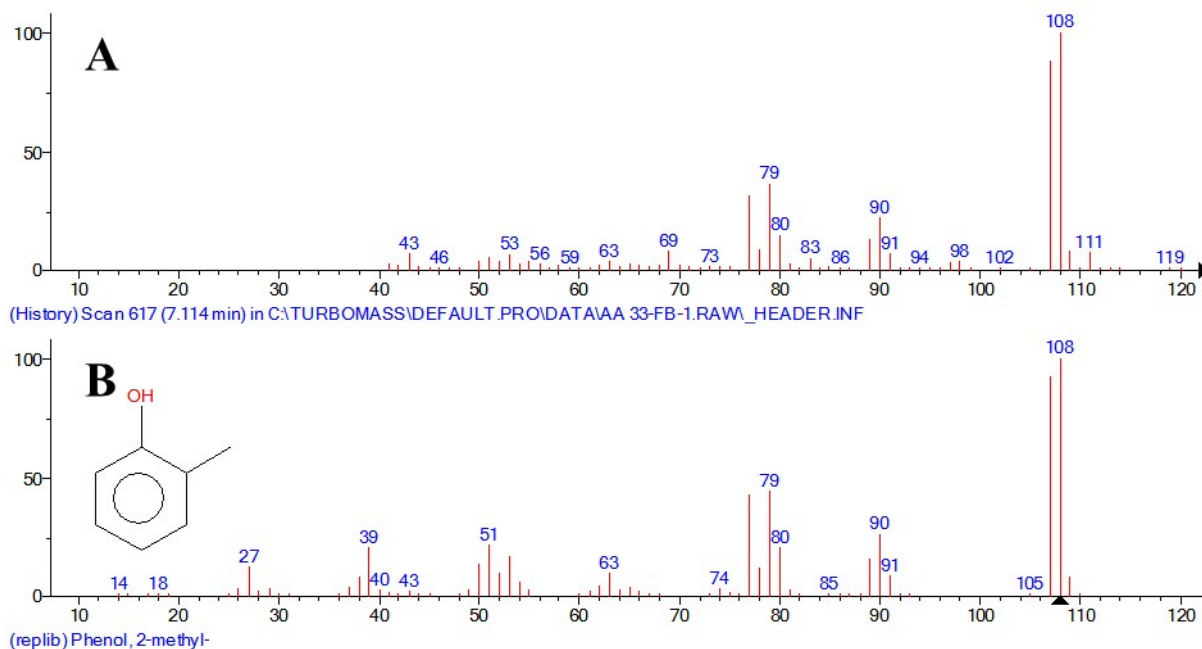

**SI Figure 40:** Matching MS spectrum of peak 7.12 MS in phenolic extract GC-MS: A) MS of peak 7.12 in phenolic extract sample; B) MS of Phenol, 2-methyl- according to NIST library.

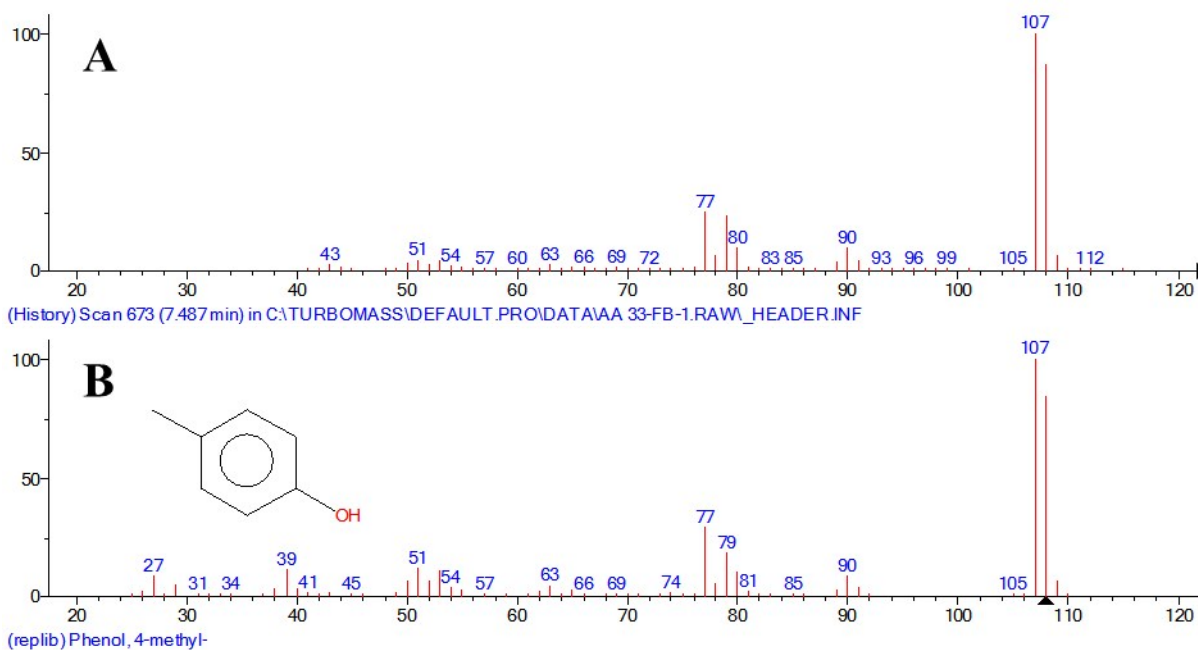

**SI Figure 41:** Matching MS spectrum of peak 7.49 MS in phenolic extract GC-MS: A) MS of peak 7.49 in phenolic extract sample; B) MS of Phenol, 4-methyl- according to NIST library.

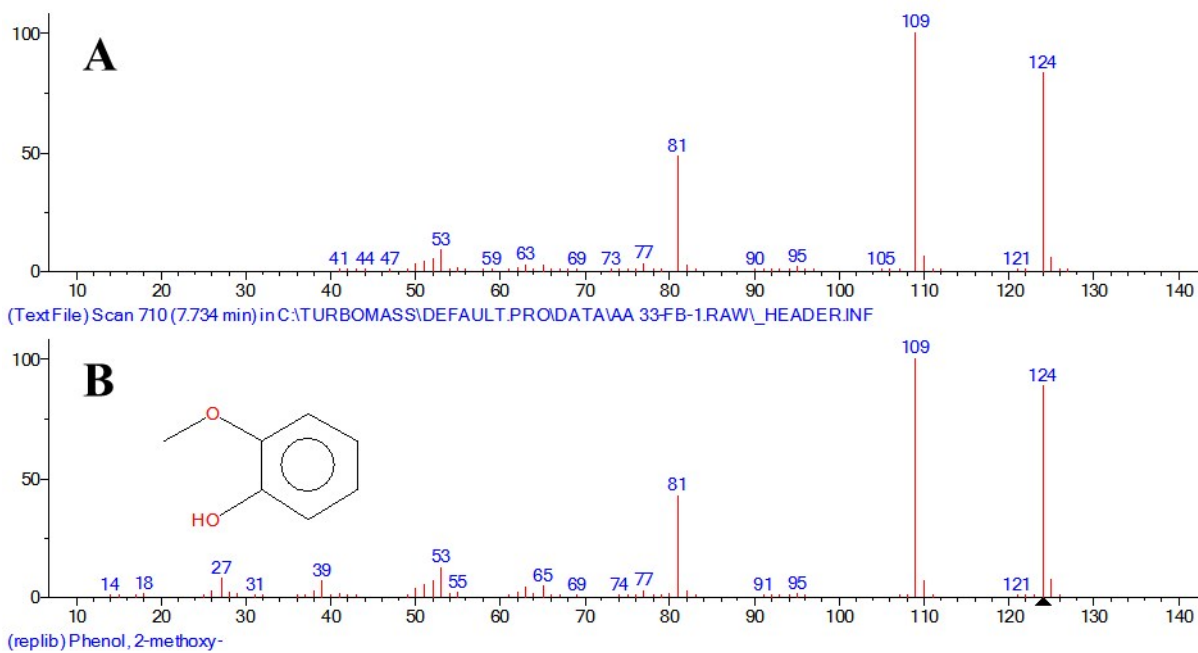

**SI Figure 42:** Matching MS spectrum of peak 7.73 MS in phenolic extract GC-MS: A) MS of peak 7.73 in phenolic extract sample; B) MS of Phenol, 2-methoxy- according to NIST library.

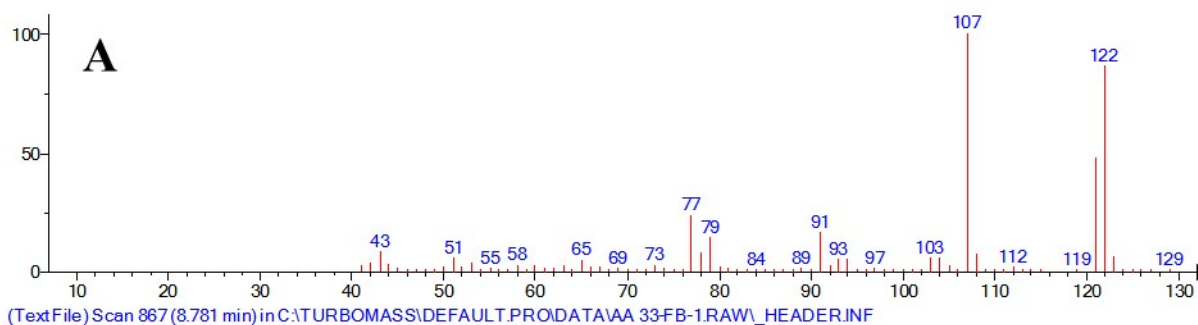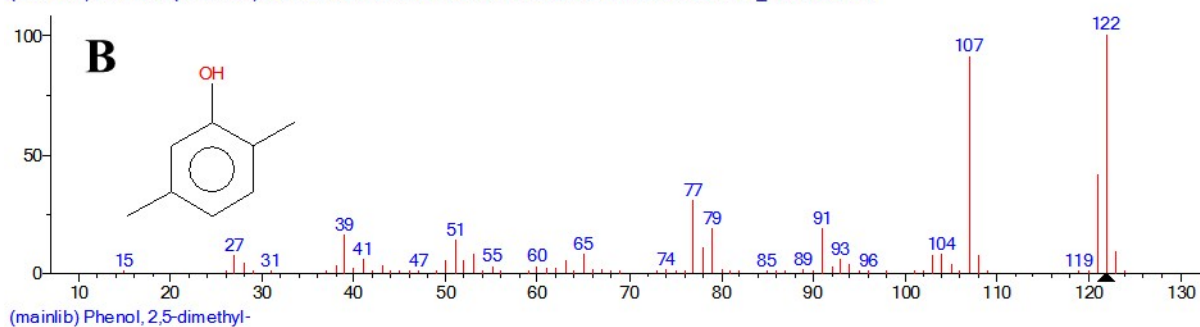

**SI Figure 43:** Matching MS spectrum of peak 8.79 MS in phenolic extract GC-MS: A) MS of peak 8.79 in phenolic extract sample; B) MS of Phenol, 2,5-dimethyl- according to NIST library.

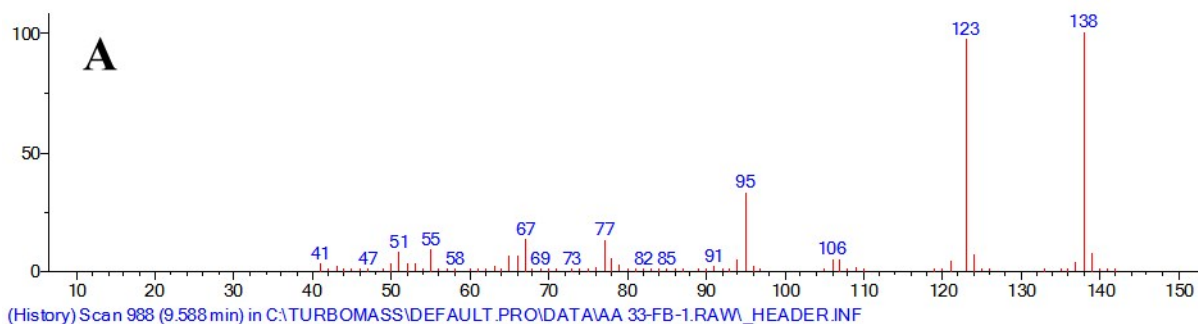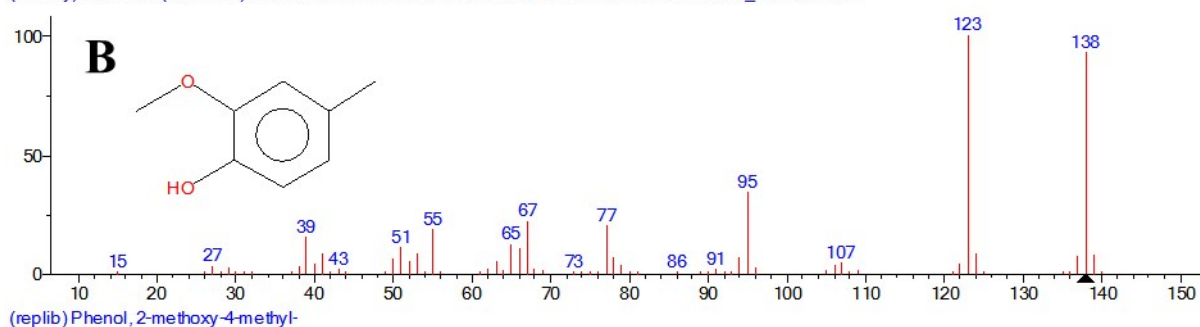

**SI Figure 44:** Matching MS spectrum of peak 9.59 MS in phenolic extract GC-MS: A) MS of peak 9.59 in phenolic extract sample; B) MS of Phenol, 2-methoxy-4-methyl- according to NIST library.

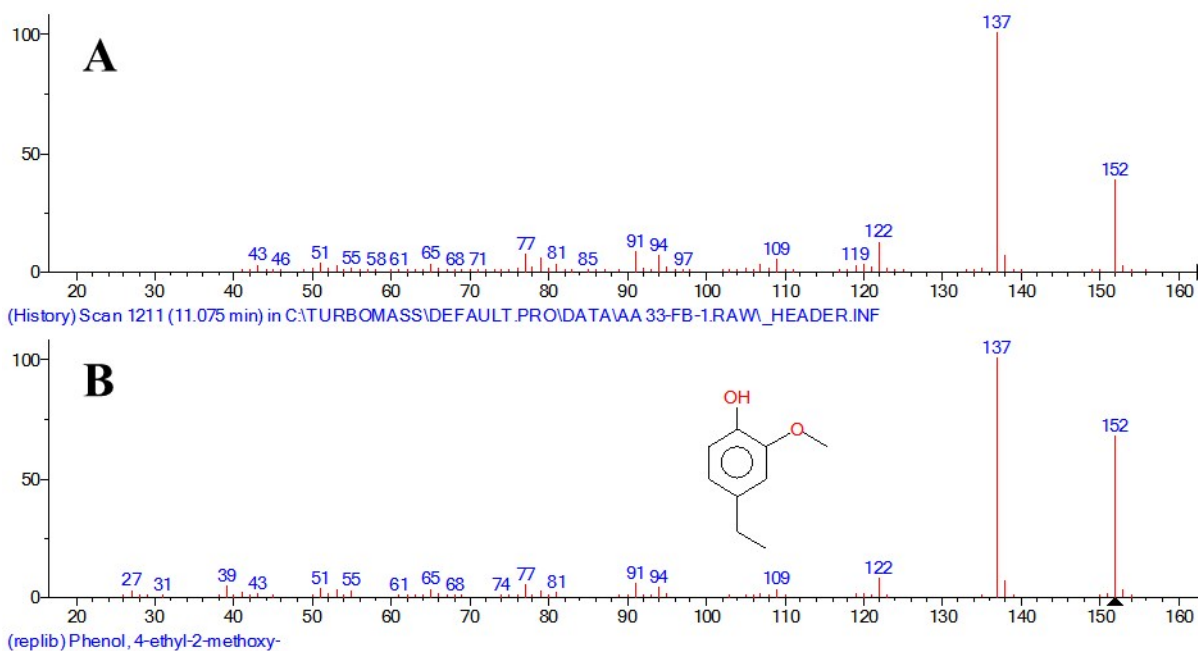

**SI Figure 45:** Matching MS spectrum of peak 11.06 MS in phenolic extract GC-MS: A) MS of peak 11.06 in phenolic extract sample; B) MS of Phenol, 4-ethyl-2-methoxy- according to NIST library.

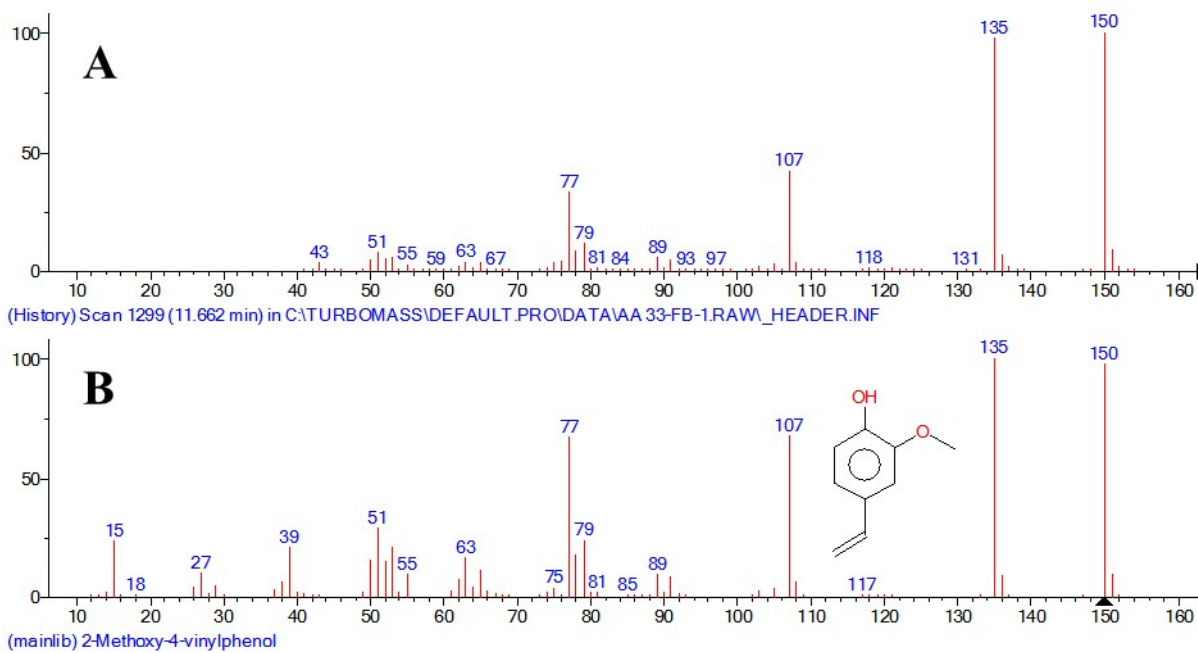

**SI Figure 46:** Matching MS spectrum of peak 11.66 MS in phenolic extract GC-MS: A) MS of peak 11.66 in phenolic extract sample; B) MS of 2-Methoxy-4-vinylphenol according to NIST library.



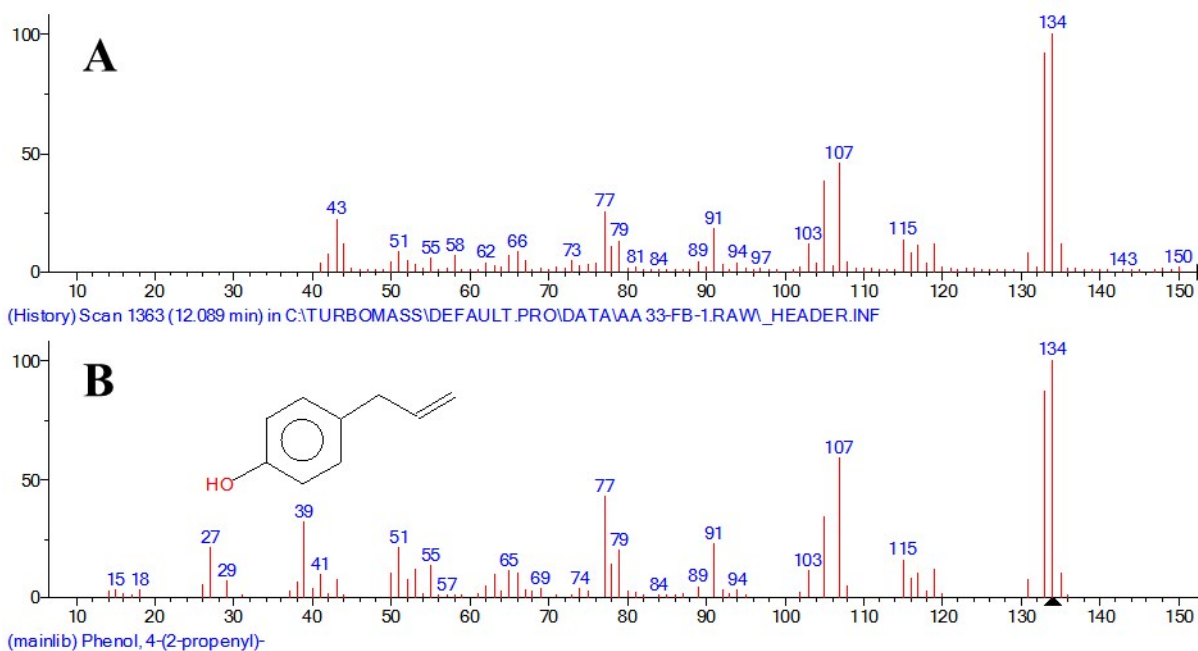

**SI Figure 47:** Matching MS spectrum of peak 12.10 MS in phenolic extract GC-MS: A) MS of peak 12.10 in phenolic extract sample; B) MS of Phenol, 4-(2-propenyl)- according to NIST library.

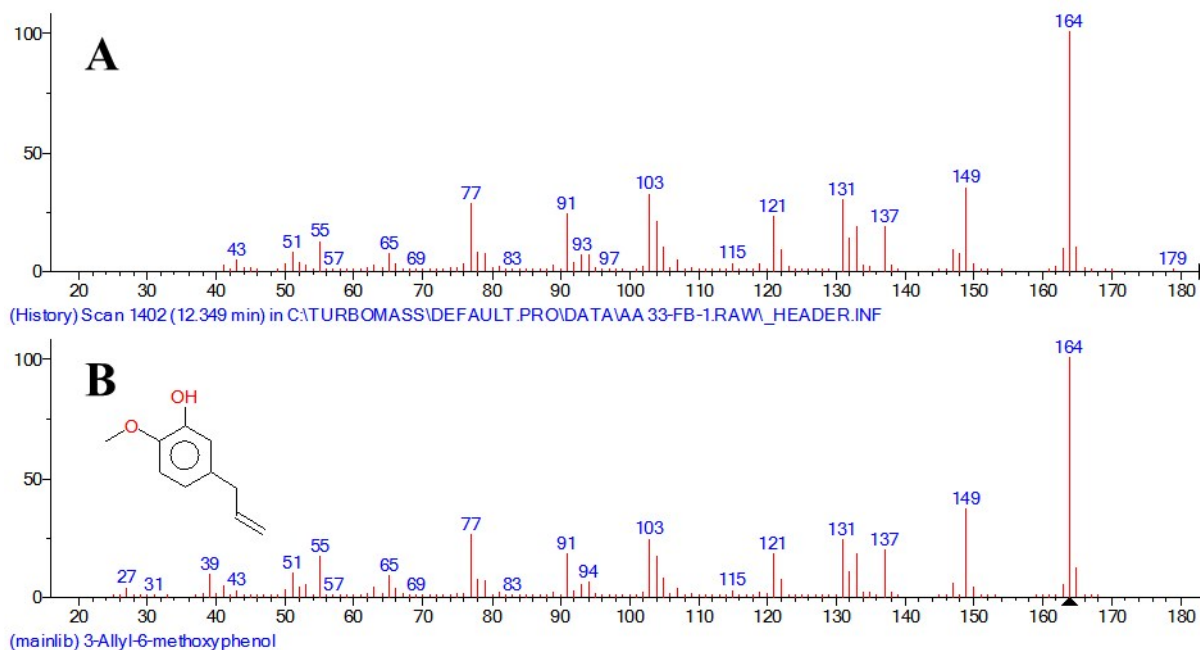

**SI Figure 48:** Matching MS spectrum of peak 12.36 MS in phenolic extract GC-MS: A) MS of peak 12.36 in phenolic extract sample; B) MS of 3-Allyl-6-methoxyphenol according to NIST library.

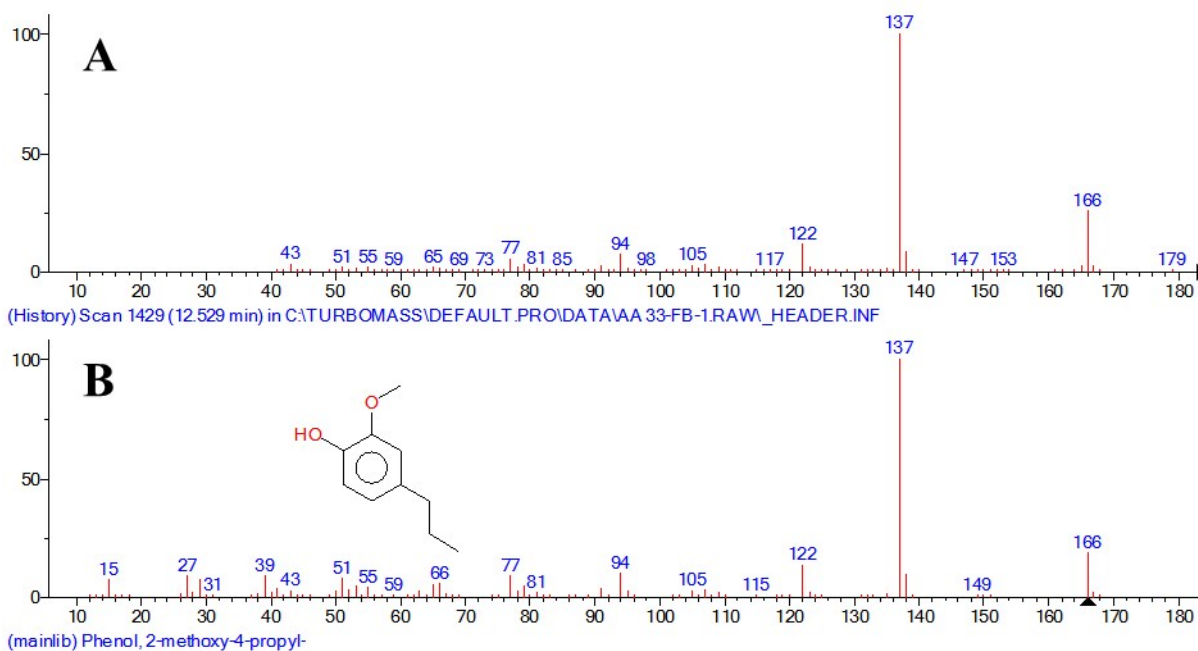

**SI Figure 49:** Matching MS spectrum of peak 12.53 MS in phenolic extract GC-MS: A) MS of peak 12.53 in phenolic extract sample; B) MS of Phenol, 2-methoxy-4-propyl- according to NIST library.

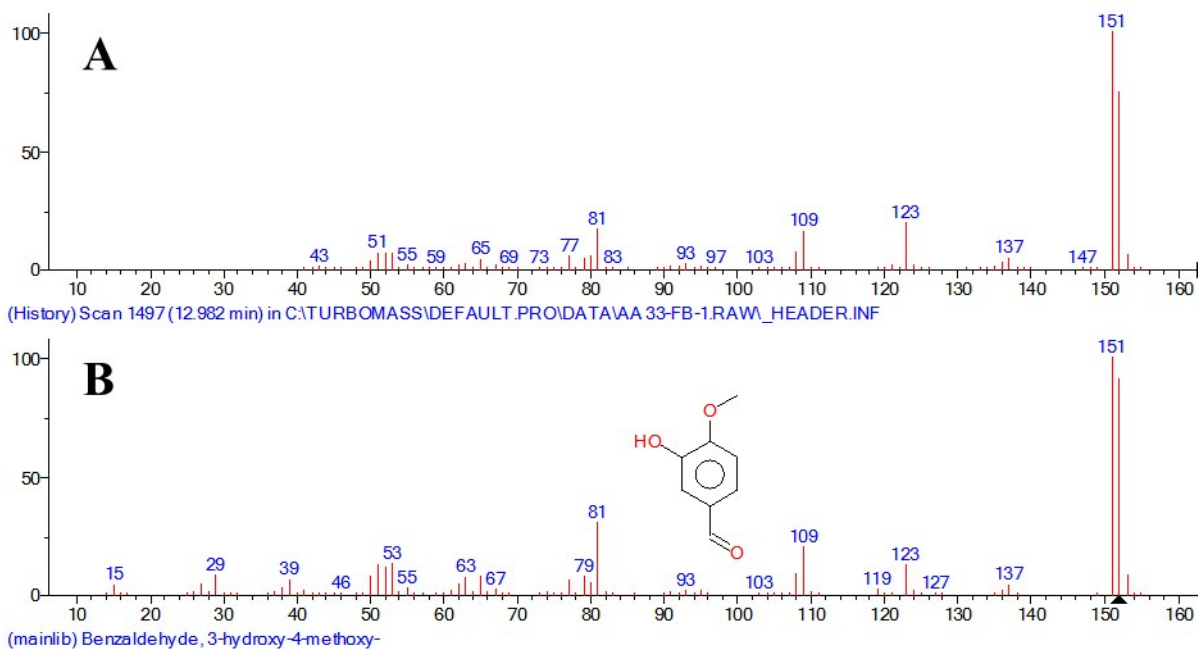

**SI Figure 50:** Matching MS spectrum of peak 13.00 MS in phenolic extract GC-MS: A) MS of peak 13.00 in phenolic extract sample; B) MS of Benzaldehyde, 3-hydroxy-4-methoxy- according to NIST library.

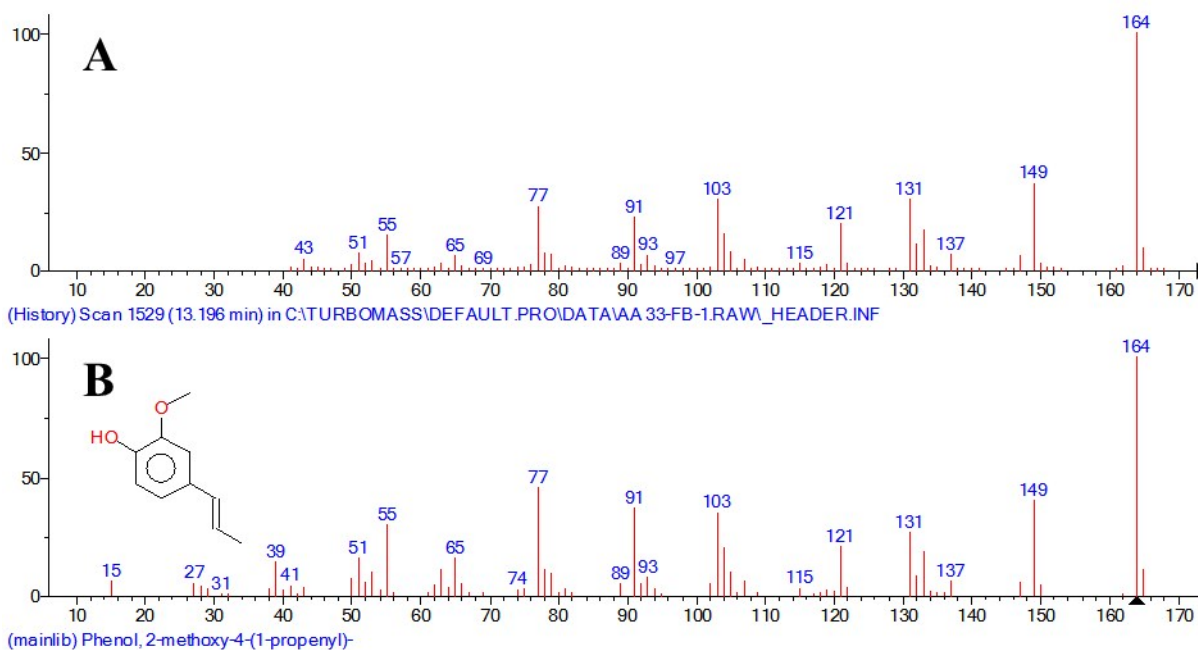

**SI Figure 51:** Matching MS spectrum of peak 13.19 MS in phenolic extract GC-MS: A) MS of peak 13.19 in phenolic extract sample; B) MS of Phenol, 2-methoxy-4-(1-propenyl)- according to NIST library.

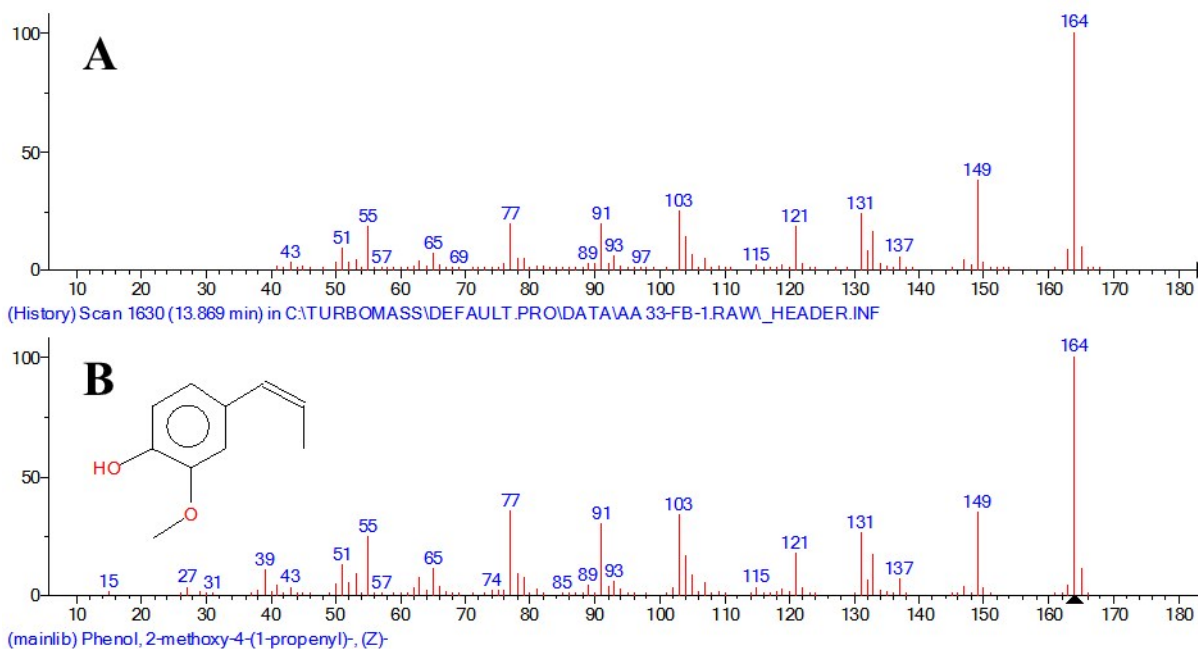

**SI Figure 52:** Matching MS spectrum of peak 13.87 MS in phenolic extract GC-MS: A) MS of peak 13.87 in phenolic extract sample; B) MS of Phenol, 2-methoxy-4-(1-propenyl)-, (Z)- according to NIST library.

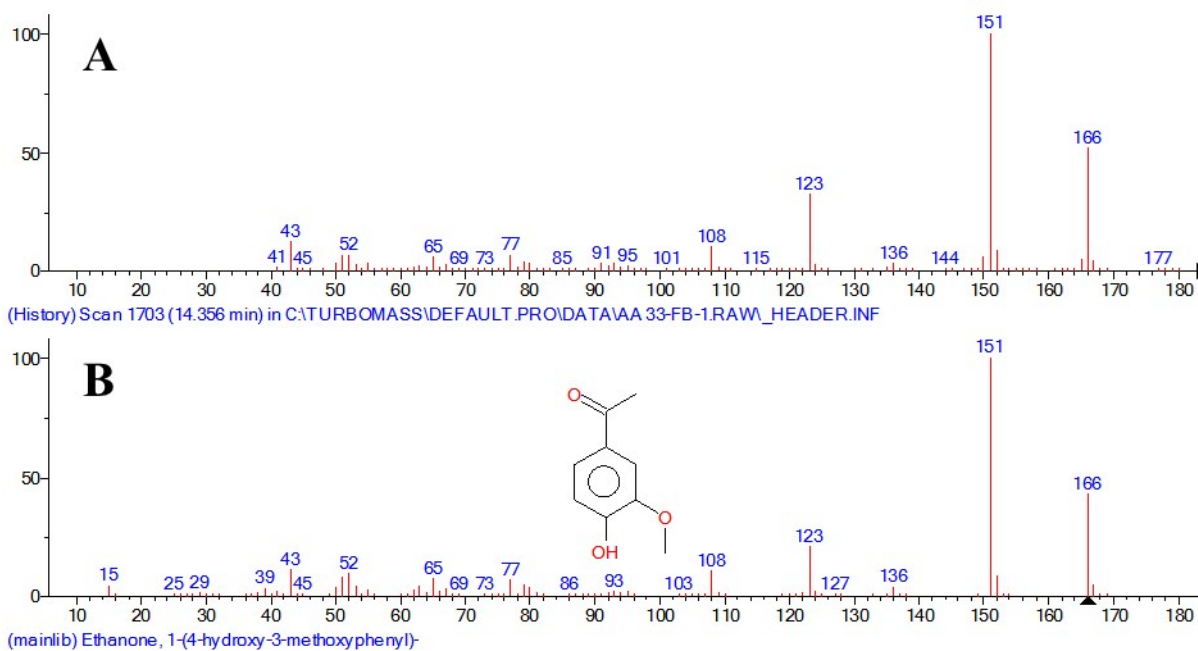

**SI Figure 53:** Matching MS spectrum of peak 14.36 MS in phenolic extract GC-MS: A) MS of peak 14.36 in phenolic extract sample; B) MS of Ethanone, 1-(4-hydroxy-3-methoxyphenyl)- according to NIST library.

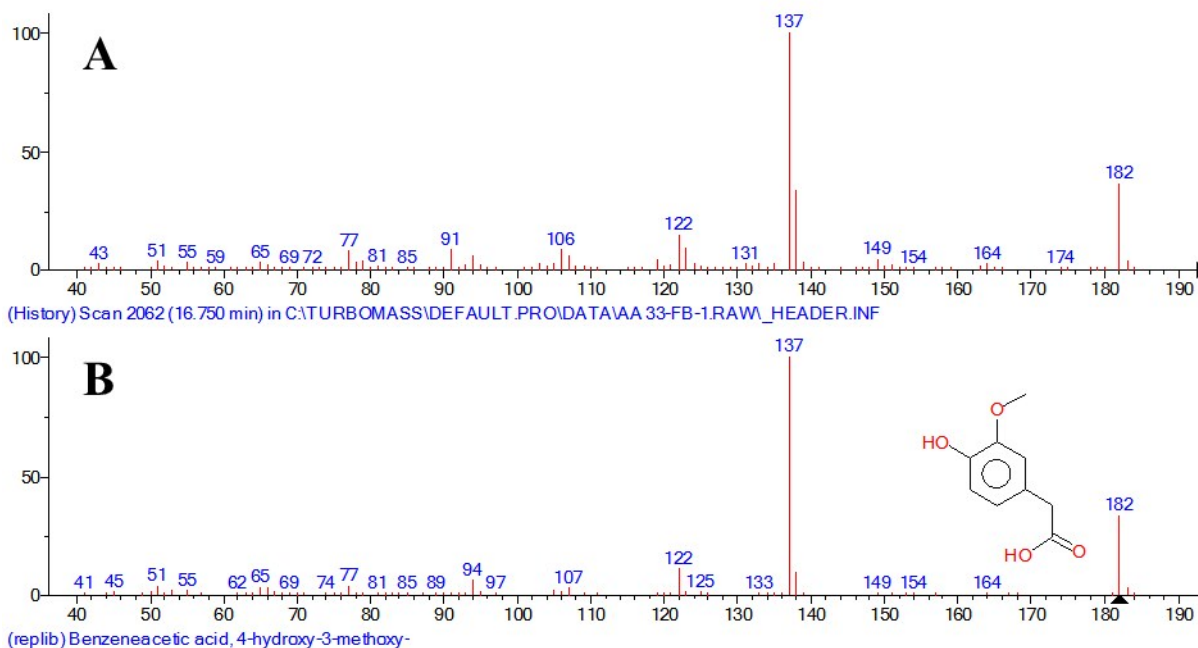

**SI Figure 54:** Matching MS spectrum of peak 16.75 MS in phenolic extract GC-MS: A) MS of peak 16.75 in phenolic extract sample; B) MS of Benzeneacetic acid, 4-hydroxy-3-methoxy- according to NIST library.

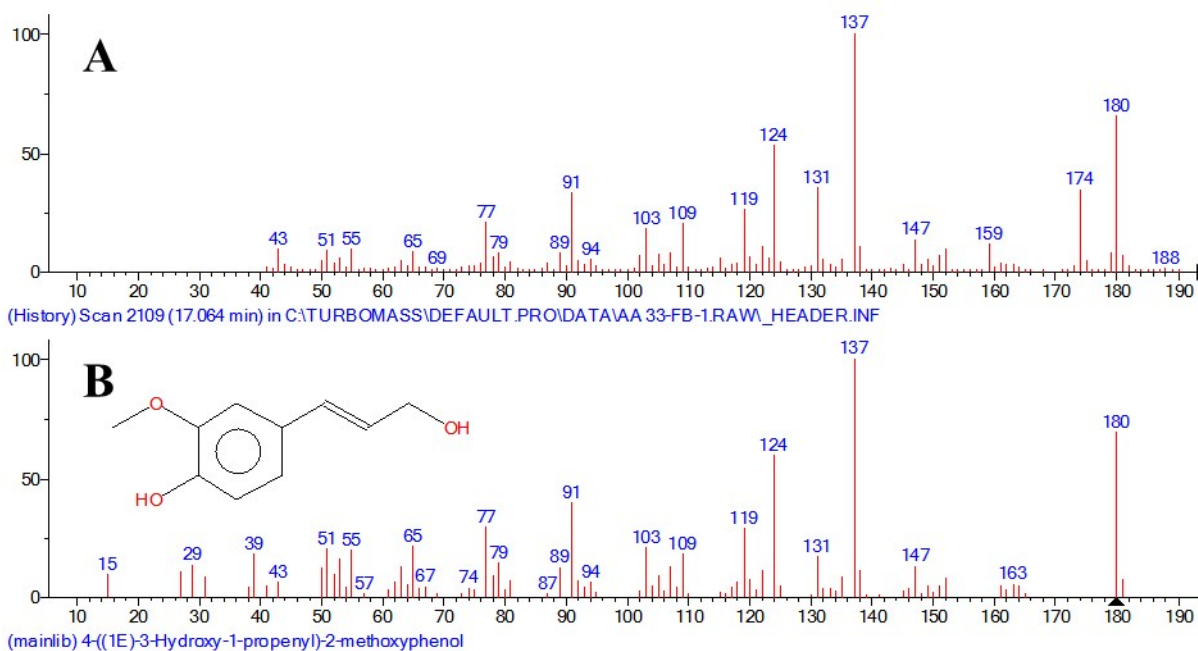

**SI Figure 55:** Matching MS spectrum of peak 17.06 MS in phenolic extract GC-MS: A) MS of peak 17.06 in phenolic extract sample; B) MS of 4-((1E)-3-Hydroxy-1-propenyl)-2-methoxyphenol according to NIST library.

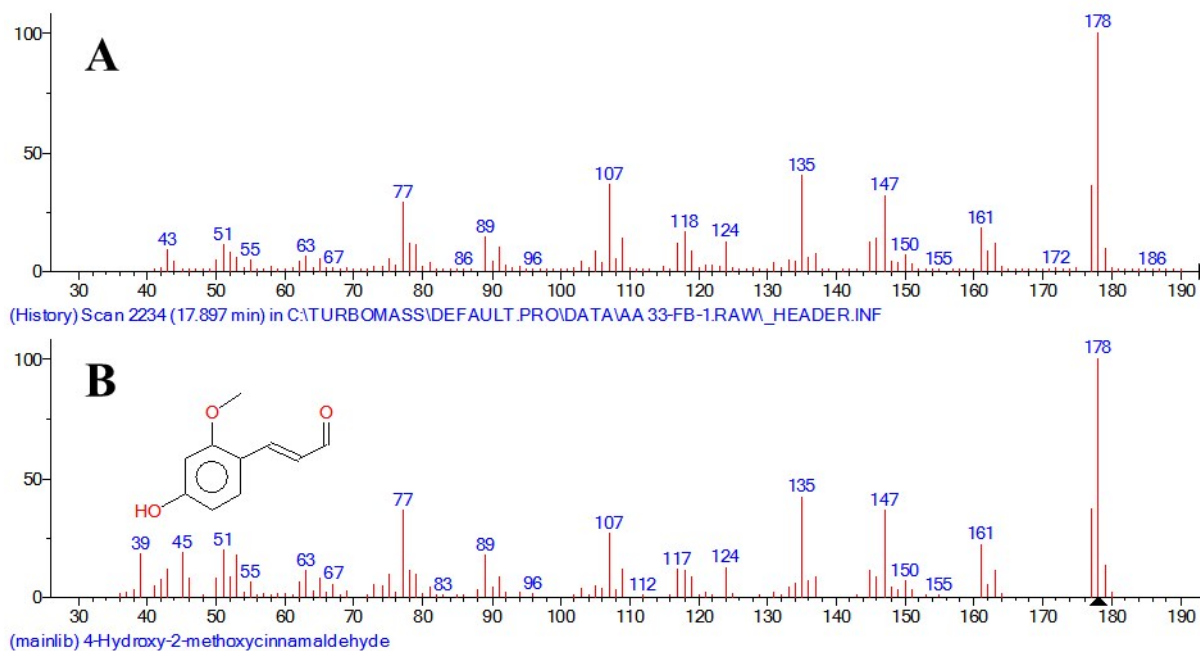

**SI Figure 56:** Matching MS spectrum of peak 17.90 MS in phenolic extract GC-MS: A) MS of peak 17.90 in phenolic extract sample; B) MS of 4-Hydroxy-2-methoxycinnamaldehyde according to NIST library.

Organic acids extract MS of identified phenols and their best MS match from NIST Spectral library.

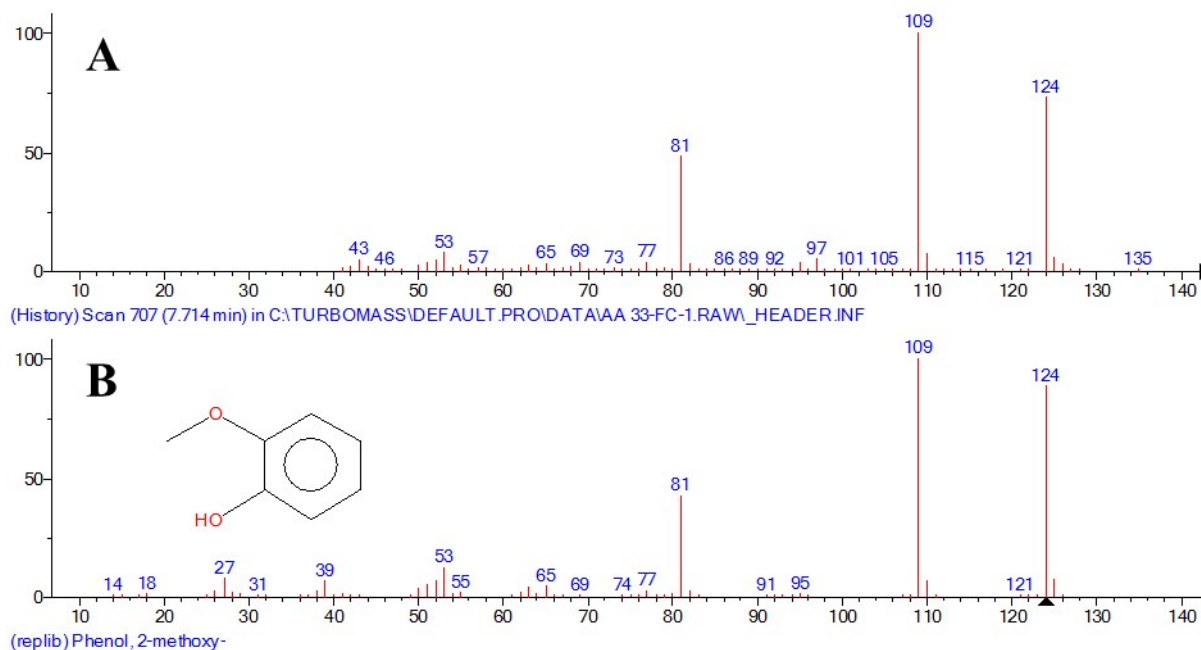

**SI Figure 57:** Matching MS spectrum of peak 7.72 MS in organic acids extract GC-MS: A) MS of peak 7.72 in organic acids extract sample; B) MS of Phenol, 2-methoxy- according to NIST library.

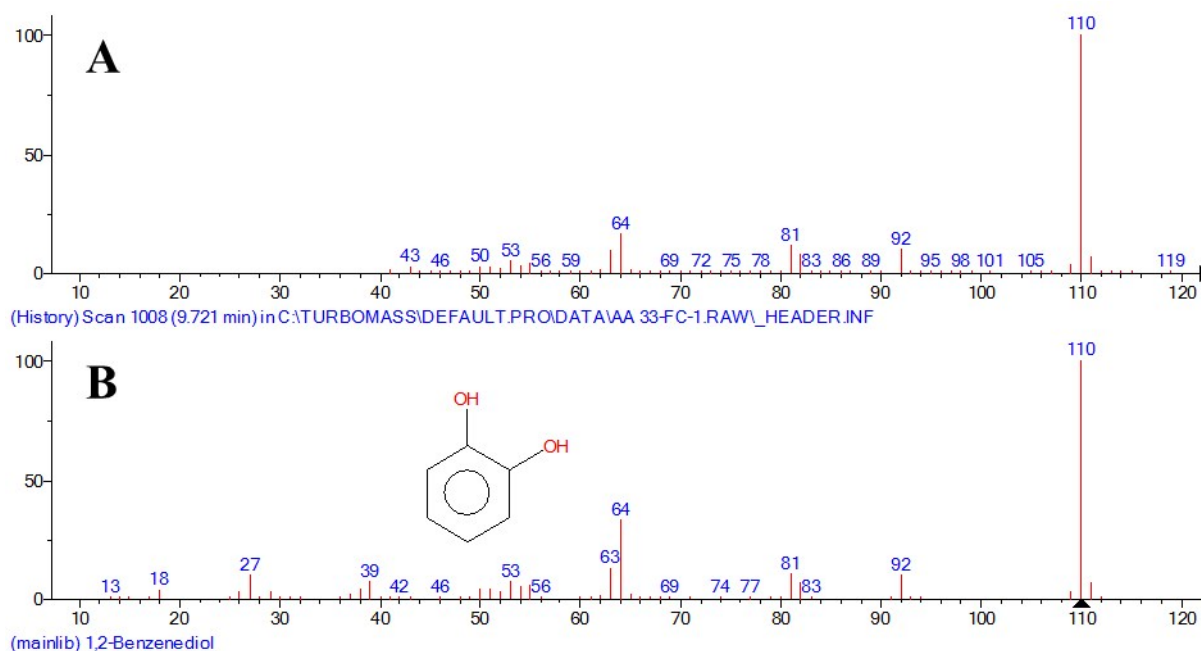

**SI Figure 58:** Matching MS spectrum of peak 9.72 MS in organic acids extract GC-MS: A) MS of peak 9.72 in organic acids extract sample; B) MS of 1,2-Benzenediol according to NIST library.

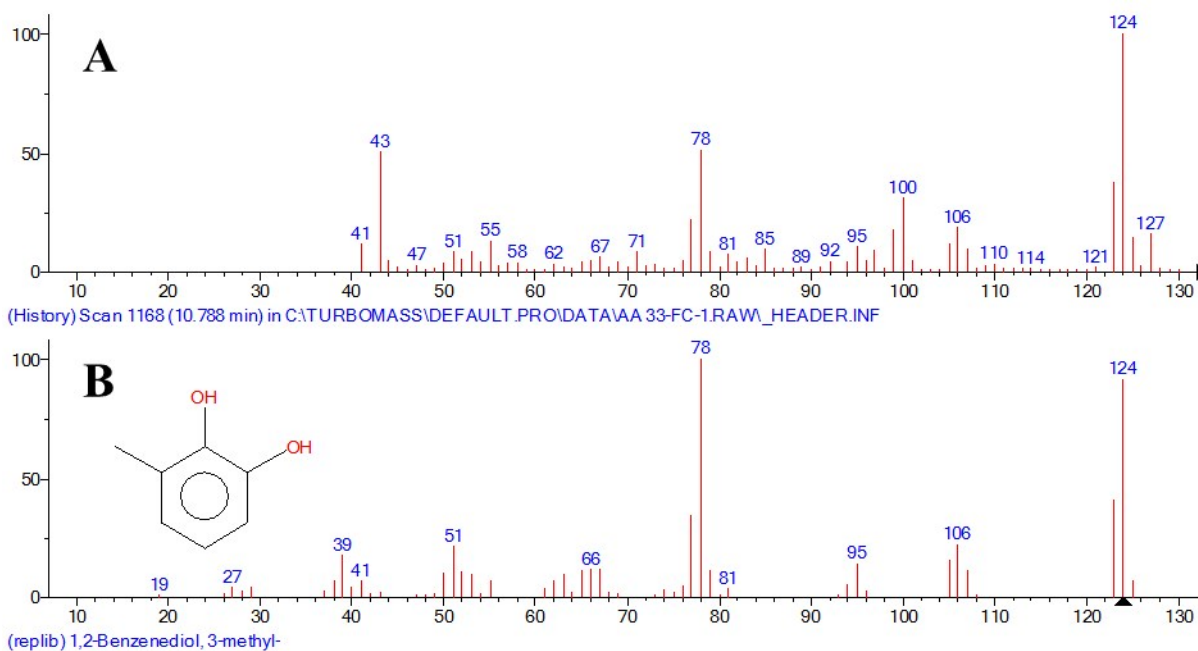

**SI Figure 59:** Matching MS spectrum of peak 10.79 MS in organic acids extract GC-MS: A) MS of peak 10.79 in organic acids extract sample; B) MS of 1,2-Benzenediol, 3-methyl- according to NIST library.

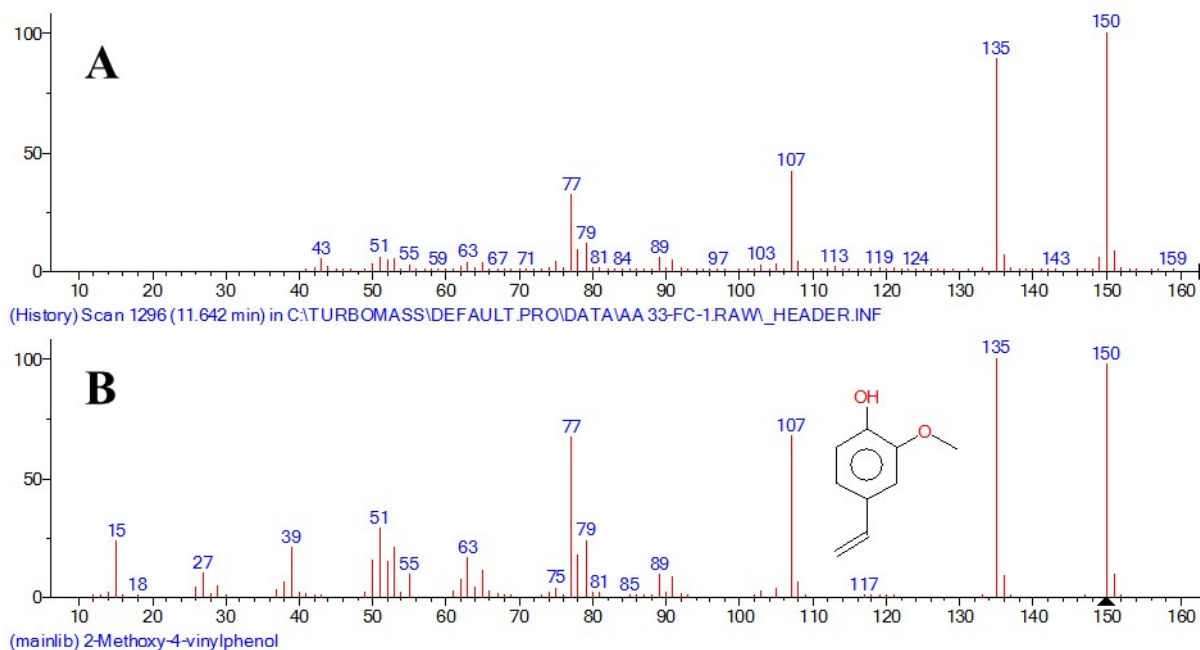

**SI Figure 60:** Matching MS spectrum of peak 11.64 MS in organic acids extract GC-MS: A) MS of peak 11.64 in organic acids extract sample; B) MS of 2-Methoxy-4-vinylphenol according to NIST library.

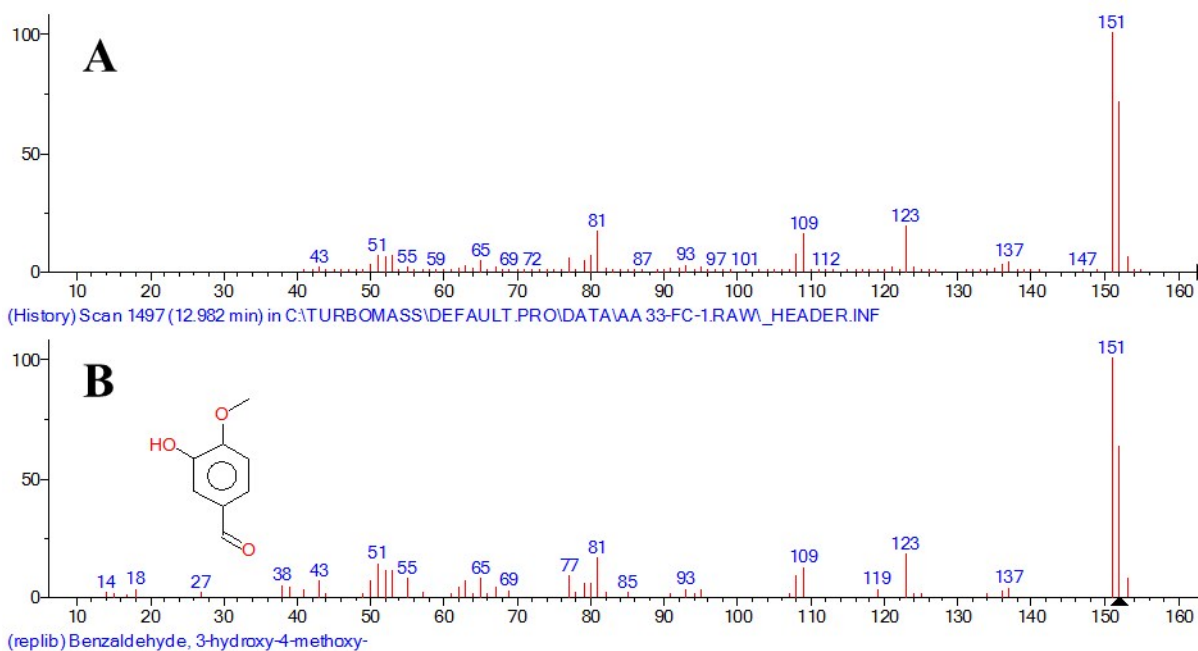

**SI Figure 61:** Matching MS spectrum of peak 12.98 MS in organic acids extract GC-MS: A) MS of peak 12.98 in organic acids extract sample; B) MS of Benzaldehyde, 3-hydroxy-4-methoxy- according to NIST library.

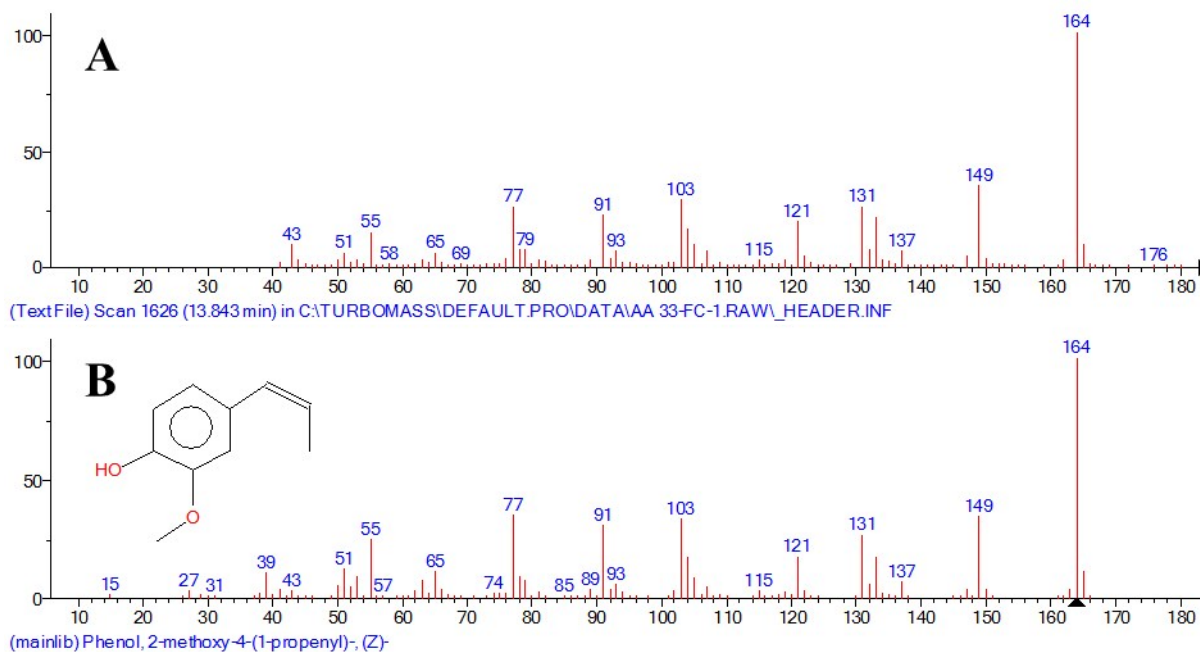

**SI Figure 62:** Matching MS spectrum of peak 13.84 MS in organic acids extract GC-MS: A) MS of peak 13.84 in organic acids extract sample; B) MS of Phenol, 2-methoxy-4-(1-propenyl)-, (Z)- according to NIST library.



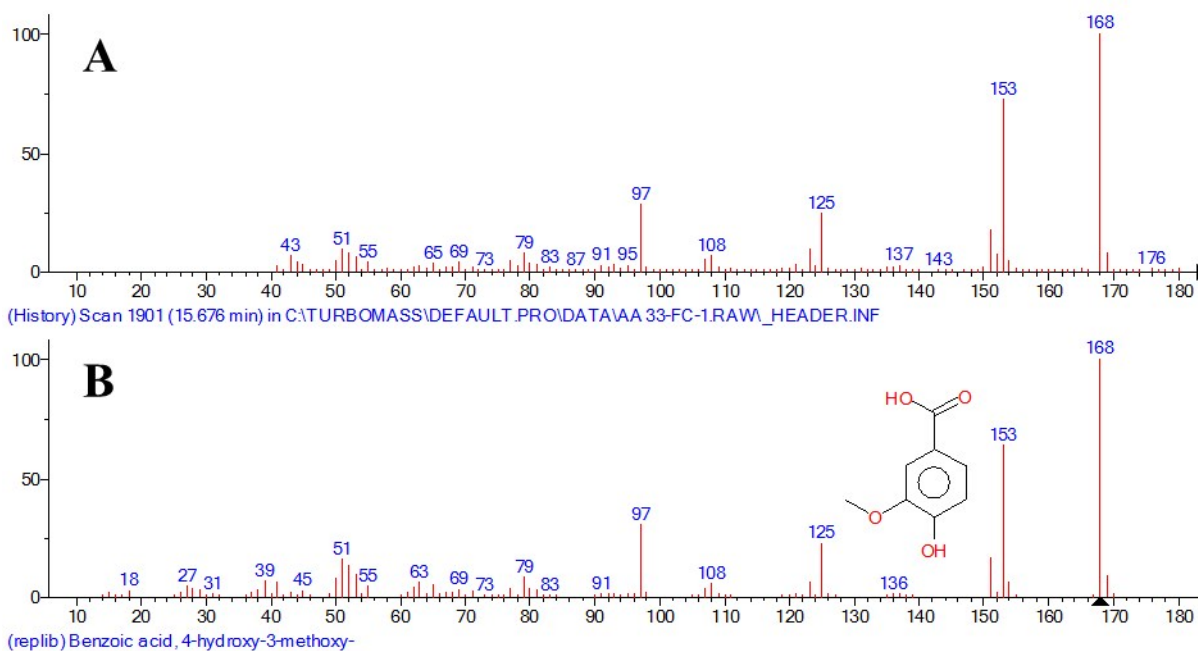

**SI Figure 63:** Matching MS spectrum of peak 15.68 MS in organic acids extract GC-MS: A) MS of peak 15.68 in organic acids extract sample; B) MS of Benzoic acid, 4-hydroxy-3-methoxy- according to NIST library.

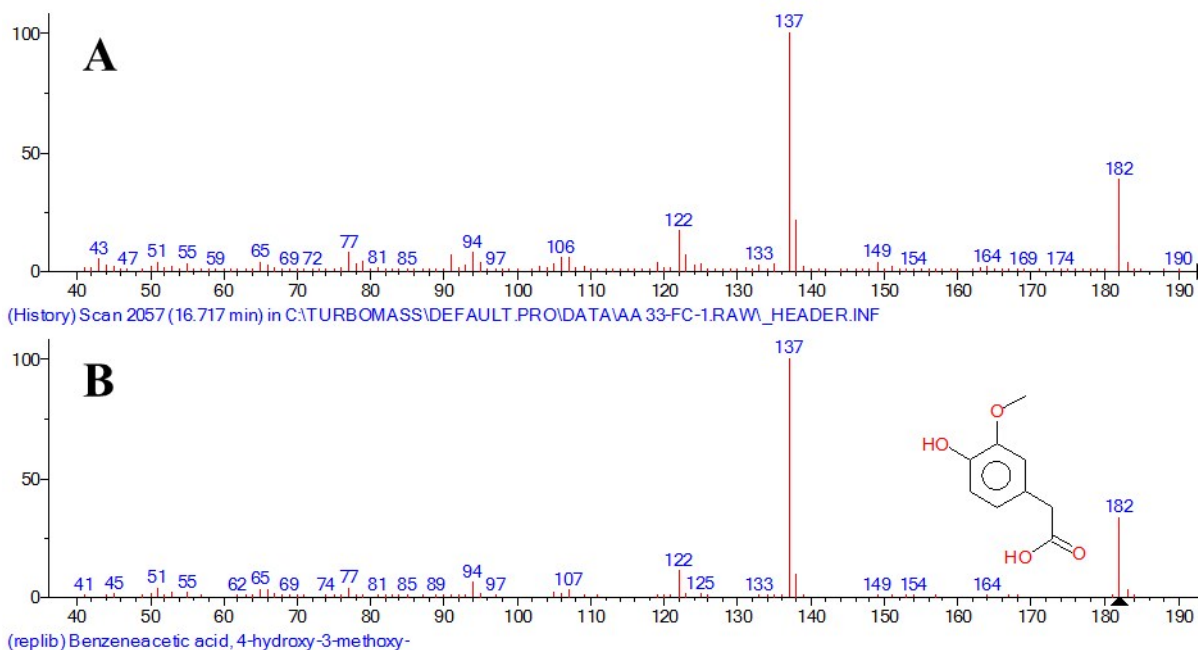

**SI Figure 64:** Matching MS spectrum of peak 16.74 MS in organic acids extract GC-MS: A) MS of peak 16.74 in organic acids extract sample; B) MS of Benzeneacetic acid, 4-hydroxy-3-methoxy- according to NIST library.

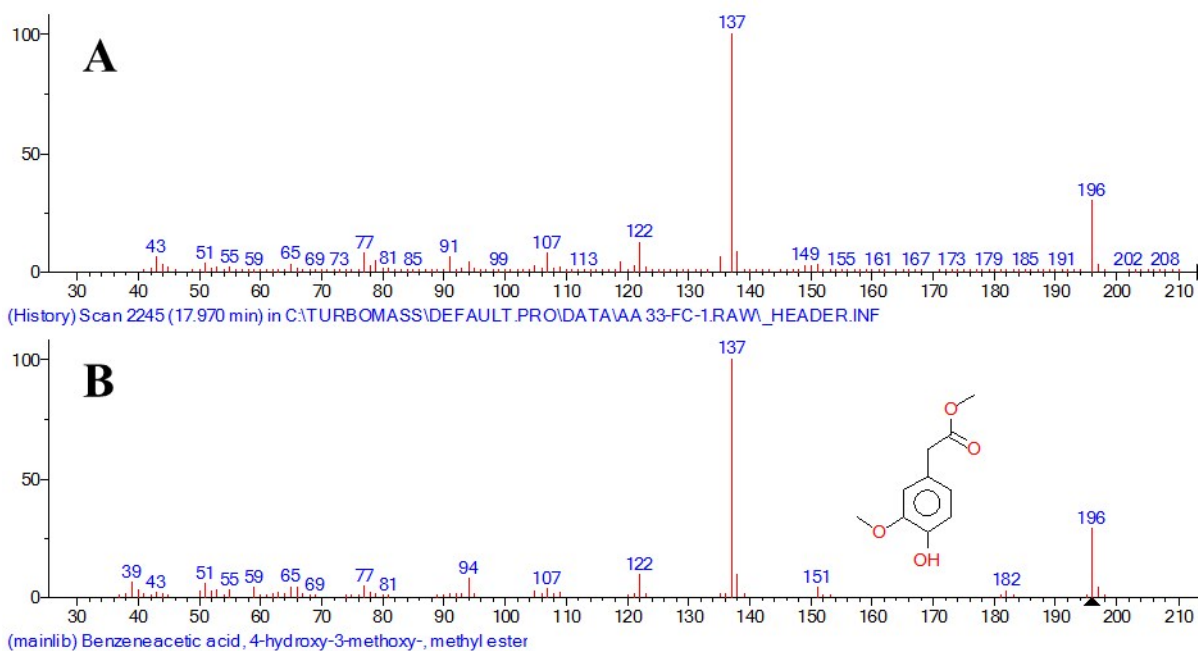

**SI Figure 65:** Matching MS spectrum of peak 17.97 MS in organic acids extract GC-MS: A) MS of peak 17.97 in organic acids extract sample; B) MS of Benzeneacetic acid, 4-hydroxy-3-methoxy-, methyl ester according to NIST library.

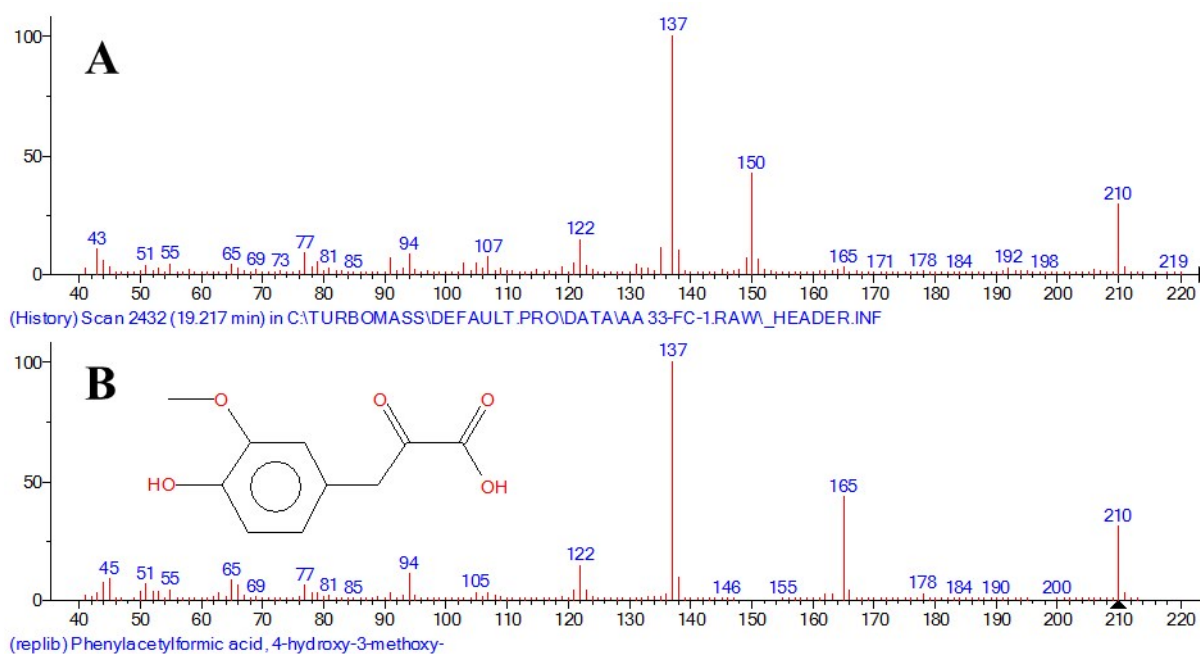

**SI Figure 66:** Matching MS spectrum of peak 19.22 MS in organic acids extract GC-MS: A) MS of peak 19.22 in organic acids extract sample; B) MS of Phenylacetylformic acid, 4-hydroxy-3-methoxy- according to NIST library.

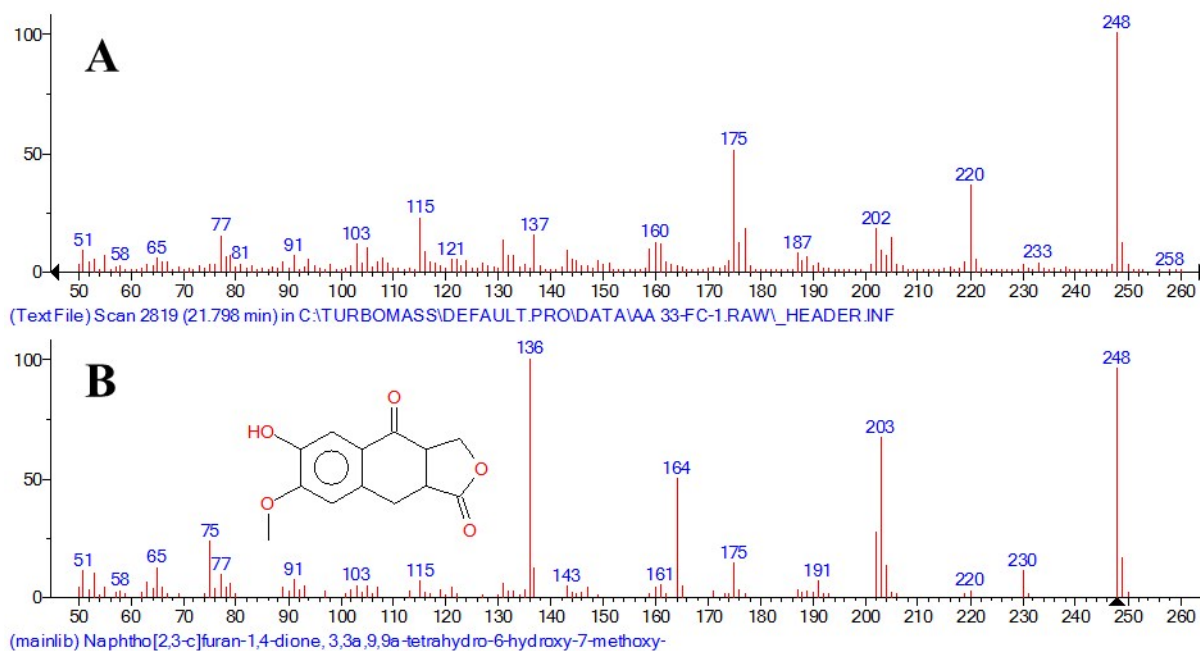

**SI Figure 67:** Matching MS spectrum of peak 21.80 MS in organic acids extract GC-MS: A) MS of peak 21.80 in organic acids extract sample; B) MS of Naphtho[2,3-c]furan-1,4-dione, 3,3a,9,9a-tetrahydro-6-hydroxy-7-methoxy- according to NIST library.

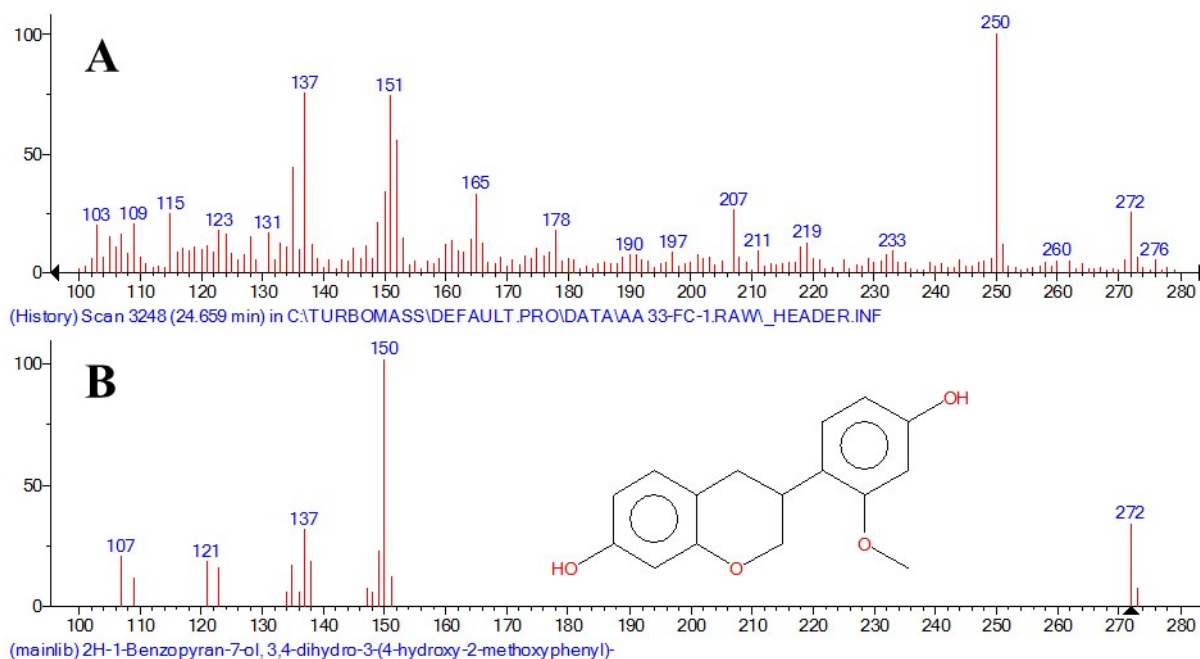

**SI Figure 68:** Matching MS spectrum of peak 24.66 MS in organic acids extract GC-MS: A) MS of peak 24.66 in organic acids extract sample; B) MS of 2H-1-Benzopyran-7-ol, 3,4-dihydro-3-(4-hydroxy-2-methoxyphenyl)- according to NIST library.

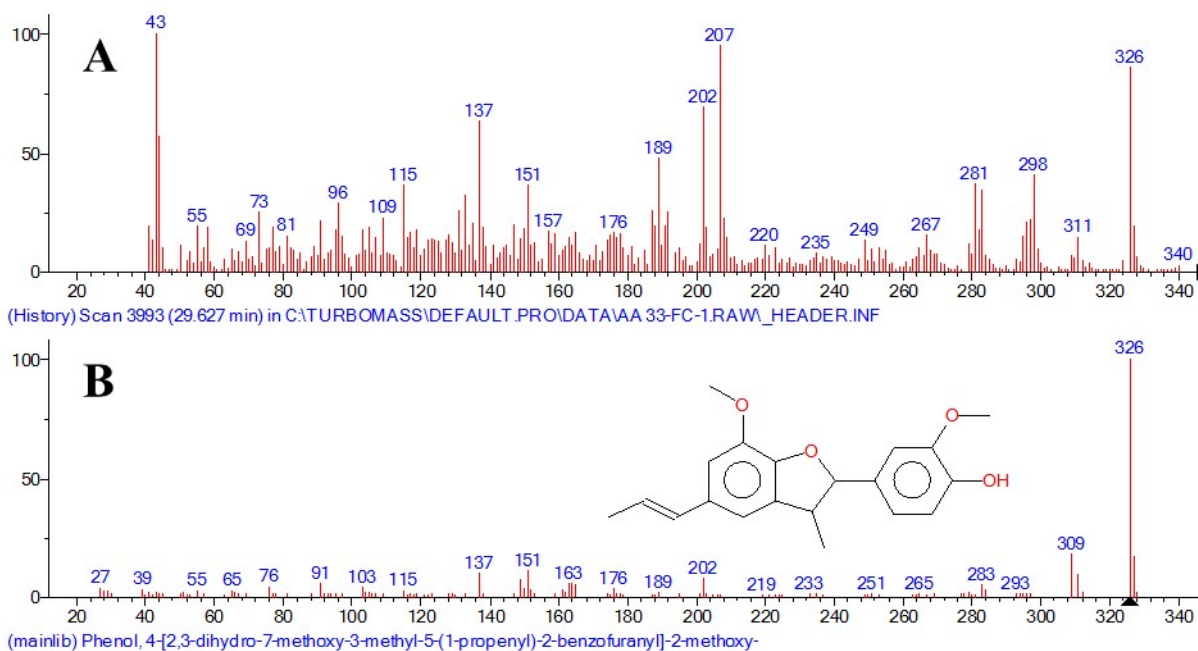

**SI Figure 69:** Matching MS spectrum of peak 29.63 MS in organic acids extract GC-MS: A) MS of peak 29.63 in organic acids extract sample; B) MS of Phenol, 4-[2,3-dihydro-7-methoxy-3-methyl-5-(1-propenyl)-2-benzofuranyl]-2-methoxy- according to NIST library.

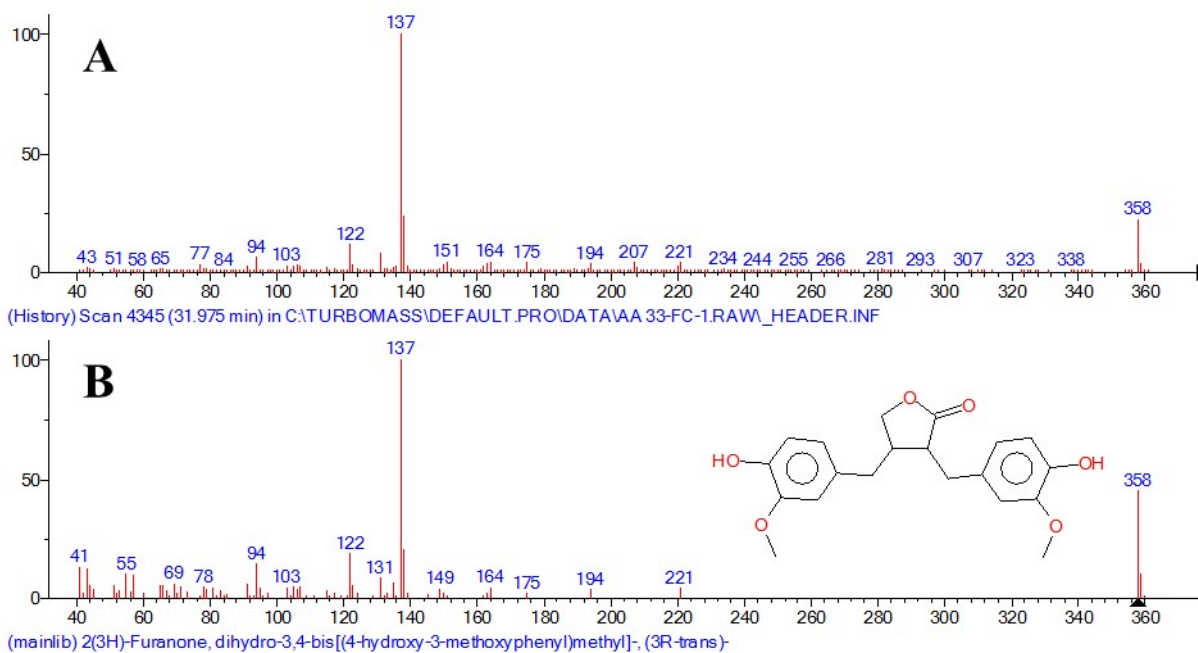

**SI Figure 70:** Matching MS spectrum of peak 31.98 MS in organic acids extract GC-MS: A) MS of peak 31.98 in organic acids extract sample; B) MS of 2(3H)-Furanone, dihydro-3,4-bis[(4-hydroxy-3-methoxyphenyl)methyl]-, (3R-trans)- according to NIST library.

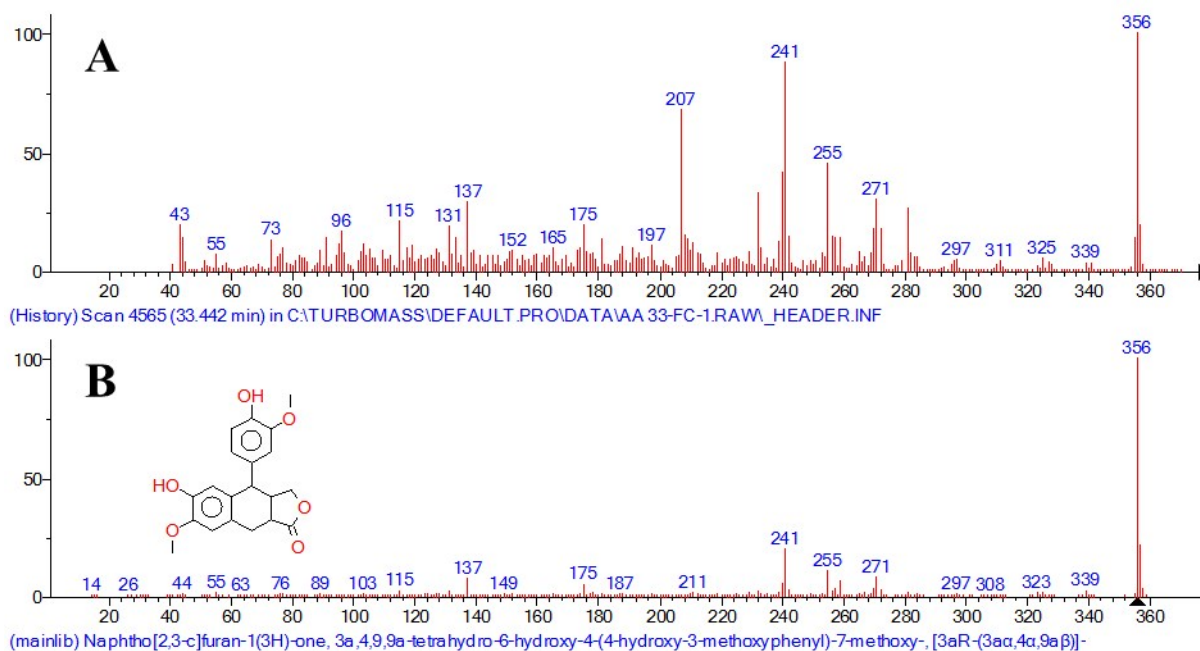

**SI Figure 71:** Matching MS spectrum of peak 33.44 MS in organic acids extract GC-MS: A) MS of peak 33.44 in organic acids extract sample; B) MS of Naphtho[2,3-c]furan-1(3H)-one, 3a,4,9,9a-tetrahydro-6-hydroxy-4-(4-hydroxy-3-methoxyphenyl)-7-methoxy-, [3aR-(3α,4α,9αβ)]- according to NIST library.

**SI Table 1:** ECN reduction values by functional group used for analysis in this experiment.

| Functional Group  | ECN Reduction | Source            |
|-------------------|---------------|-------------------|
| Phenol            | - 0.83        | (27) <sup>a</sup> |
| Ether             | - 1.00        | (25) <sup>b</sup> |
| Olefinic C        | - 0.05        | (25)              |
| Carbonyl          | - 1.00        | (25)              |
| Carboxyl          | - 1.00        | (25)              |
| Primary Alcohol   | - 0.60        | (25)              |
| Secondary Alcohol | - 0.75        | (25)              |
| Ester             | - 1.25        | (25)              |

<sup>a</sup> According to reference number 27 in the original paper.

<sup>b</sup> According to reference number 25 in the original paper.

**SI Table 2:** ECN reduction by functional group for each identified phenolic compound including the standard compound.

| Structure                                                                           | Name                        | Group(s)                        | No. of carbons | Reduction                | ECN (theoretical) |
|-------------------------------------------------------------------------------------|-----------------------------|---------------------------------|----------------|--------------------------|-------------------|
|    | Phenol                      | phenol                          | 6              | 0.83                     | 5.17              |
|    | Phenol, 2-methyl-           | phenol                          | 7              | 0.83                     | 6.17              |
|    | Phenol, 4-methyl-           | phenol                          | 7              | 0.83                     | 6.17              |
|    | Phenol, 2-methoxy-          | phenol + ether                  | 7              | 0.83 + 1.00              | 5.17              |
|    | Phenol, 2,5-dimethyl-       | phenol                          | 8              | 0.83                     | 7.17              |
|    | 1,3-Benzenediol, 4-ethyl-   | two phenol                      | 8              | 2 x 0.83                 | 6.34              |
|    | Phenol, 2-methoxy-4-methyl- | phenol + ether                  | 8              | 0.83 + 1.00              | 6.17              |
|   | 1,2-Benzenediol             | two phenol                      | 6              | 2 x 0.83                 | 4.34              |
|  | 1,2-Benzenediol, 3-methyl-  | two phenol                      | 7              | 2 x 0.83                 | 5.34              |
|  | Phenol, 4-ethyl-2-methoxy-  | phenol + ether                  | 9              | 0.83 + 1.00              | 7.17              |
|  | 1,2-Benzenediol, 4-methyl-  | two phenol                      | 7              | 2 x 0.83                 | 5.34              |
|  | 2-Methoxy-4-vinylphenol     | phenol + ether + two olefinic C | 9              | 0.83 + 1.00 + (2 x 0.05) | 7.07              |
|  | Phenol, 4-(2-propenyl)-     | phenol + two olefinic C         | 9              | 0.83 + (2 x 0.05)        | 8.07              |
|  | 3-Allyl-6-methoxyphenol     | phenol + ether + two olefinic C | 10             | 0.83 + 1.00 + (2 x 0.05) | 8.07              |
|  | Phenol, 2-methoxy-4-propyl- | phenol + ether                  | 10             | 0.83 + 1.00              | 8.17              |

|  |                                                        |                                                   |    |                                 |      |
|--|--------------------------------------------------------|---------------------------------------------------|----|---------------------------------|------|
|  | Benzaldehyde, 3-hydroxy-4-methoxy-                     | phenol + ether + carbonyl                         | 8  | 0.83 + 1.00 + 1.00              | 5.17 |
|  | Phenol, 2-methoxy-4-(1-propenyl)-                      | phenol + ether + two olefinic C                   | 10 | 0.83 + 1.00 + (2 x 0.05)        | 8.07 |
|  | Phenol, 2-methoxy-4-(1-propenyl)-, (Z)-                | phenol + ether + two olefinic C                   | 10 | 0.83 + 1.00 + (2 x 0.05)        | 8.07 |
|  | 3,7-Benzofurandiols, 2,3-dihydro-2,2-dimethyl-         | phenol + ether + secondary alcohol                | 10 | 0.83 + 1.00 + 0.75              | 7.42 |
|  | Ethanone, 1-(4-hydroxy-3-methoxyphenyl)-               | phenol + ether + carbonyl                         | 9  | 0.83 + 1.00 + 1.00              | 6.17 |
|  | 2-Propanone, 1-(4-hydroxy-3-methoxyphenyl)-            | Phenol + ether + carbonyl                         | 10 | 0.83 + 1.00 + 1.00              | 7.17 |
|  | Phenol, 4-(3-hydroxy-1-propenyl)-2-methoxy-            | phenol + ether + two olefinic C + primary alcohol | 10 | 0.83 + 1.00 + (2 x 0.05) + 0.60 | 7.47 |
|  | Benzoic acid, 4-hydroxy-3-methoxy-                     | phenol + ether + carboxyl                         | 8  | 0.83 + 1.00 + 1.00              | 5.17 |
|  | Benzeneacetic acid, 4-hydroxy-3-methoxy-               | phenol + ether + carboxyl                         | 9  | 0.83 + 1.00 + 1.00              | 6.17 |
|  | 4-((1E)-3-Hydroxy-1-propenyl)-2-methoxyphenol          | phenol + ether + two olefinic C + primary alcohol | 10 | 0.83 + 1.00 + (2 x 0.05) + 0.60 | 7.47 |
|  | 4-Hydroxy-2-methoxycinnamaldehyde                      | phenol + ether + two olefinic C + carbonyl        | 10 | 0.83 + 1.00 + (2 x 0.05) + 1.00 | 7.07 |
|  | Benzeneacetic acid, 4-hydroxy-3-methoxy-, methyl ester | phenol + ether + ester                            | 10 | 0.83 + 1.00 + 1.25              | 6.92 |
|  | Phenylacetylformic acid, 4-hydroxy-3-methoxy-          | phenol + ether + carbonyl + carboxyl              | 10 | 0.83 + 1.00 + 1.00 + 1.00       | 6.17 |

|  |                                                                                                                            |                                       |    |                                |       |
|--|----------------------------------------------------------------------------------------------------------------------------|---------------------------------------|----|--------------------------------|-------|
|  | Naphtho[2,3-c]furan-1,4-dione, 3,3a,9,9a-tetrahydro-6-hydroxy-7-methoxy-                                                   | Phenol + ether + carbonyl + ester     | 13 | 0.83 + 1.00 + 1.00 + 1.25      | 8.92  |
|  | 2H-1-Benzopyran-7-ol, 3,4-dihydro-3-(4-hydroxy-2-methoxyphenyl)-                                                           | two phenol + two ether                | 16 | (2 x 0.83) + (2 x 1.00)        | 12.34 |
|  | Podocarpa-8,11,13-triene-7β,13-diol, 14-isopropyl-                                                                         | phenol + secondary alcohol            | 20 | 0.83 + 0.75                    | 18.42 |
|  | Phenol, 4-[2,3-dihydro-7-methoxy-3-methyl-5-(1-propenyl)-2-benzofuranyl]-2-methoxy-                                        | phenol + three ether + two olefinic C | 20 | 0.83 + (3 x 1.00) + (2 x 0.05) | 16.07 |
|  | 2(3H)-Furanone, dihydro-3,4-bis[(4-hydroxy-3-methoxyphenyl)methyl]-, (3R-trans)-                                           | two phenol + two ether + ester        | 20 | (2 x 0.83) + (2 x 1.00) + 1.25 | 15.09 |
|  | Naphtho[2,3-c]furan-1(3H)-one, 3a,4,9,9a-tetrahydro-6-hydroxy-4-(4-hydroxy-3-methoxyphenyl)-7-methoxy-, [3aR-(3α,4α,9aβ)]- | two phenol + two ether + ester        | 20 | (2 x 0.83) + (2 x 1.00) + 1.25 | 15.09 |
|  | Butylated Hydroxytoluene                                                                                                   | phenol                                | 15 | 0.83                           | 14.17 |

**SI Table 3:** The exact amounts of standard antioxidants blended with 2 ml methyl linoleate and their measured induction time at 120 °C and 1 bar of oxygen.

| Antioxidant | Sample weight (mg) | Phenolic Concentration (mg/ml) | Phenolic Concentration (mol/dm <sup>3</sup> ) x 10 <sup>-3</sup> | Phenolic Concentration (% w/w) | Induction time (min) |
|-------------|--------------------|--------------------------------|------------------------------------------------------------------|--------------------------------|----------------------|
| BHT         | 0                  | 0                              | 0                                                                | 0                              | 0                    |
|             | 2.7                | 1.35                           | 6                                                                | 0.15                           | 54                   |
|             | 8.9                | 4.45                           | 20                                                               | 0.5                            | 108                  |
|             | 17.8               | 8.9                            | 40                                                               | 1                              | 148                  |
|             | 35.6               | 17.8                           | 80                                                               | 2                              | 192                  |
| Eugenol     | 0                  | 0                              | 0                                                                | 0                              | 0                    |
|             | 8.9                | 4.45                           | 27                                                               | 0.5                            | 23                   |
|             | 17.8               | 8.9                            | 54                                                               | 1                              | 32                   |
|             | 35.6               | 17.8                           | 108                                                              | 2                              | 34                   |
|             | 53.4               | 26.7                           | 162                                                              | 3                              | 36                   |
| Catechol    | 0                  | 0                              | 0                                                                | 0                              | 0                    |
|             | 2.7                | 1.35                           | 12.3                                                             | 0.15                           | 38                   |
|             | 8.9                | 4.45                           | 40.5                                                             | 0.5                            | 134                  |
|             | 17.8               | 8.9                            | 81                                                               | 1                              | 80                   |
|             | 35.6               | 17.8                           | 162                                                              | 2                              | 28                   |



**SI Table 4:** The exact amounts of crude extracts blended with 2 ml methyl linoleate and their measured induction time at 120 °C and 1 bar of oxygen.

| Extract ID            | Sample weight <sup>a</sup> (mg) | Phenolic Concentration <sup>b</sup> (mg EE/ml) | Phenolic Concentration <sup>c</sup> (mol EE/dm <sup>3</sup> ) x 10 <sup>-3</sup> | Phenolic Concentration <sup>d</sup> (% w EE/w) | Induction time (min) |
|-----------------------|---------------------------------|------------------------------------------------|----------------------------------------------------------------------------------|------------------------------------------------|----------------------|
| Crude bio-oil         | 0                               | 0                                              | 0                                                                                | 0                                              | 0                    |
|                       | 25                              | 2.88                                           | 17.38                                                                            | 0.32                                           | 52                   |
|                       | 50                              | 5.75                                           | 34.75                                                                            | 0.65                                           | 98                   |
|                       | 100                             | 11.5                                           | 69.5                                                                             | 1.30                                           | 163                  |
| Water-soluble extract | 0                               | 0                                              | 0                                                                                | 0                                              | 0                    |
|                       | 25                              | 1.75                                           | 10.38                                                                            | 0.2                                            | 22                   |
|                       | 50                              | 3.5                                            | 20.75                                                                            | 0.4                                            | 48                   |
|                       | 100                             | 7                                              | 41.5                                                                             | 0.79                                           | 87                   |
| Neutral extract       | 0                               | 0                                              | 0                                                                                | 0                                              | 0                    |
|                       | 25                              | 1.38                                           | 8.63                                                                             | 0.16                                           | 8                    |
|                       | 50                              | 2.75                                           | 17.25                                                                            | 0.31                                           | 14                   |
|                       | 100                             | 5.5                                            | 34.5                                                                             | 0.62                                           | 18                   |
| Phenolic extract      | 0                               | 0                                              | 0                                                                                | 0                                              | 0                    |
|                       | 25                              | 6.25                                           | 37.75                                                                            | 0.70                                           | 50                   |
|                       | 50                              | 12.5                                           | 75.5                                                                             | 1.41                                           | 108                  |
|                       | 100                             | 25                                             | 151                                                                              | 2.81                                           | 128                  |
| Organic acids extract | 0                               | 0                                              | 0                                                                                | 0                                              | 0                    |
|                       | 25                              | 4.75                                           | 29.13                                                                            | 0.53                                           | 45                   |
|                       | 50                              | 9.5                                            | 58.25                                                                            | 1.07                                           | 88                   |
|                       | 100                             | 19                                             | 116.5                                                                            | 2.14                                           | 100                  |

<sup>a</sup> Actual extract weight blended with 2 ml ML.

<sup>b</sup> In eugenol equivalent (EE) as estimated according to FC reagent assay.

<sup>c</sup> In eugenol equivalent (EE) as estimated according to FC reagent assay.

<sup>d</sup> In eugenol equivalent (EE) as estimated according to FC reagent assay.

**SI Table 5:** The calculated concentrations of each detected phenolic compound via GC-FID in 100 mg crude bio-oil or its extracts that blended with 2 ml methyl linoleate <sup>a</sup>.

| Structure                                                                           | Name                        | Concentration (mol/dm <sup>3</sup> ) x 10 <sup>-3</sup> |                       |                 |                  |                       |
|-------------------------------------------------------------------------------------|-----------------------------|---------------------------------------------------------|-----------------------|-----------------|------------------|-----------------------|
|                                                                                     |                             | Crude bio-oil                                           | Water-soluble extract | Neutral extract | Phenolic extract | Organic acids extract |
| 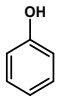   | Phenol                      | 0                                                       | /                     | /               | 0.48             | /                     |
|    | Phenol, 2-methyl-           | /                                                       | /                     | /               | 0.26             | /                     |
|    | Phenol, 4-methyl-           | 0                                                       | /                     | /               | 0.77             | /                     |
|    | Phenol, 2-methoxy-          | 3.02                                                    | /                     | 0.40            | 8.59             | 1.37                  |
|    | Phenol, 2,5-dimethyl-       | /                                                       | /                     | /               | 0.06             | /                     |
|    | 1,3-Benzenediol, 4-ethyl-   | /                                                       | /                     | 0.18            | /                | /                     |
|   | Phenol, 2-methoxy-4-methyl- | 2.27                                                    | 0.25                  | 5.07            | 12.75            | /                     |
|  | 1,2-Benzenediol             | 4.25                                                    | 3.28                  | /               | /                | 2.11                  |
|  | 1,2-Benzenediol, 3-methyl-  | /                                                       | /                     | /               | /                | 0.38                  |
|  | Phenol, 4-ethyl-2-methoxy-  | 0.59                                                    | /                     | 4.45            | 2.76             | /                     |
|  | 1,2-Benzenediol, 4-methyl-  | 0.95                                                    | /                     | /               | /                | /                     |
|  | 2-Methoxy-4-vinylphenol     | 1.53                                                    | /                     | 0.12            | 2.91             | 0.54                  |
|  | Phenol, 4-(2-propenyl)-     | /                                                       | /                     | /               | 0.19             | /                     |
|  | 3-Allyl-6-methoxyphenol     | 0.4                                                     | /                     | 4.57            | 2.61             | /                     |
|  | Phenol, 2-methoxy-4-propyl- | 0.06                                                    | /                     | 1.85            | 0.35             | /                     |

|  |                                                                          |      |      |      |       |      |
|--|--------------------------------------------------------------------------|------|------|------|-------|------|
|  | Benzaldehyde, 3-hydroxy-4-methoxy-                                       | 0.93 | 0.72 | /    | 4.5   | 2.57 |
|  | Phenol, 2-methoxy-4-(1-propenyl)-                                        | 0.12 | /    | 0.25 | 1.68  | /    |
|  | Phenol, 2-methoxy-4-(1-propenyl)-, (Z)-                                  | 2.66 | /    | 4.79 | 11.55 | 0.69 |
|  | 3,7-Benzofurandiols, 2,3-dihydro-2,2-dimethyl-                           | /    | /    | 0.39 | /     | /    |
|  | Ethanone, 1-(4-hydroxy-3-methoxyphenyl)-                                 | 0.61 | 0.18 | /    | 2.44  | /    |
|  | 2-Propanone, 1-(4-hydroxy-3-methoxyphenyl)-                              | 1.79 | 0.40 | /    | /     | /    |
|  | Phenol, 4-(3-hydroxy-1-propenyl)-2-methoxy-                              | 0.22 | 0.06 | /    | /     | /    |
|  | Benzoic acid, 4-hydroxy-3-methoxy-                                       | /    | /    | /    | /     | 2.87 |
|  | Benzeneacetic acid, 4-hydroxy-3-methoxy-                                 | 1.13 | 0.44 | 0    | 4.79  | 2.73 |
|  | 4-((1E)-3-Hydroxy-1-propenyl)-2-methoxyphenol                            | /    | /    | /    | 0.77  | /    |
|  | 4-Hydroxy-2-methoxycinnamaldehyde                                        | 0.71 | 0.17 | /    | 0.36  | /    |
|  | Benzeneacetic acid, 4-hydroxy-3-methoxy-, methyl ester                   | /    | /    | /    | /     | 0.66 |
|  | Phenylacetylformic acid, 4-hydroxy-3-methoxy-                            | /    | /    | /    | /     | 0.32 |
|  | Naphtho[2,3-c]furan-1,4-dione, 3,3a,9,9a-tetrahydro-6-hydroxy-7-methoxy- | /    | /    | /    | /     | 0.31 |
|  | 2H-1-Benzopyran-7-ol, 3,4-dihydro-3-(4-hydroxy-2-methoxyphenyl)-         | /    | /    | /    | /     | 0    |

|       |                                                                                                                            |         |        |         |         |         |
|-------|----------------------------------------------------------------------------------------------------------------------------|---------|--------|---------|---------|---------|
|       | Podocarpa-8,11,13-triene-7β,13-diol, 14-isopropyl-                                                                         | /       | /      | 0.08    | /       | /       |
|       | Phenol, 4-[2,3-dihydro-7-methoxy-3-methyl-5-(1-propenyl)-2-benzofuranyl]-2-methoxy-                                        | /       | /      | /       | /       | 0       |
|       | 2(3H)-Furanone, dihydro-3,4-bis[(4-hydroxy-3-methoxyphenyl)methyl]-, (3R-trans)-                                           | /       | /      | /       | /       | 0.63    |
|       | Naphtho[2,3-c]furan-1(3H)-one, 3a,4,9,9a-tetrahydro-6-hydroxy-4-(4-hydroxy-3-methoxyphenyl)-7-methoxy-, [3aR-(3α,4α,9aβ)]- | /       | /      | /       | /       | 0.19    |
| Total |                                                                                                                            | ~ 21.24 | ~ 5.52 | ~ 22.14 | ~ 57.81 | ~ 15.36 |

<sup>a</sup> Assuming that all detected phenolics were fully dissolved in ML.
